# Supplementary material for: Which isomer is it, 1,2,5,6- or 1,4,5,8-tetrasubstituted cycloocta-1,3,5,7-tetraene? Synthesis of symmetrically tetrasubstituted cycloocta-1,3,5,7-tetraene derivatives
Source: Royal Society of Chemistry journal article supplement (doi:10.1039/d0ob01871f), 2020-01-01
Supplement: d0ob01871f1.pdf [file d0ob01871f1.pdf]

**Which isomer is it, 1,2,5,6- or 1,4,5,8-tetrasubstituted cycloocta-1,3,5,7-tetraene?  
Synthesis of symmetrically tetrasubstituted cycloocta-1,3,5,7-tetraene derivatives**

Savita Gadigennavar,<sup>a</sup> Madhav Ranganathan<sup>a,b</sup> and Sethuraman Sankararaman<sup>a\*</sup>

<sup>a</sup>Department of Chemistry, Indian Institute of Technology Madras, Chennai 600036, India.

<sup>b</sup>Department of Chemistry, Indian Institute of Technology Kanpur, Kanpur 208016, India.

| Contents:                                                                                      | Page No. |
|------------------------------------------------------------------------------------------------|----------|
| 1. Figure 1 to 38 <sup>1</sup> H and <sup>13</sup> C NMR spectra of compounds 4-12 and 10a-10i | S2-S21   |
| 2. Single crystal X-ray crystallographic data                                                  | S22      |
| 3. Figure 39 VT-NMR spectra of <b>1</b> in D <sub>2</sub> O                                    | S23      |
| 4. Table 1-7 X-Ray analysis data for compound                                                  | S24-S30  |
| 5. Figure 40 UV-Vis spectrum of <b>10a</b> in THF various concentrations                       | S31      |

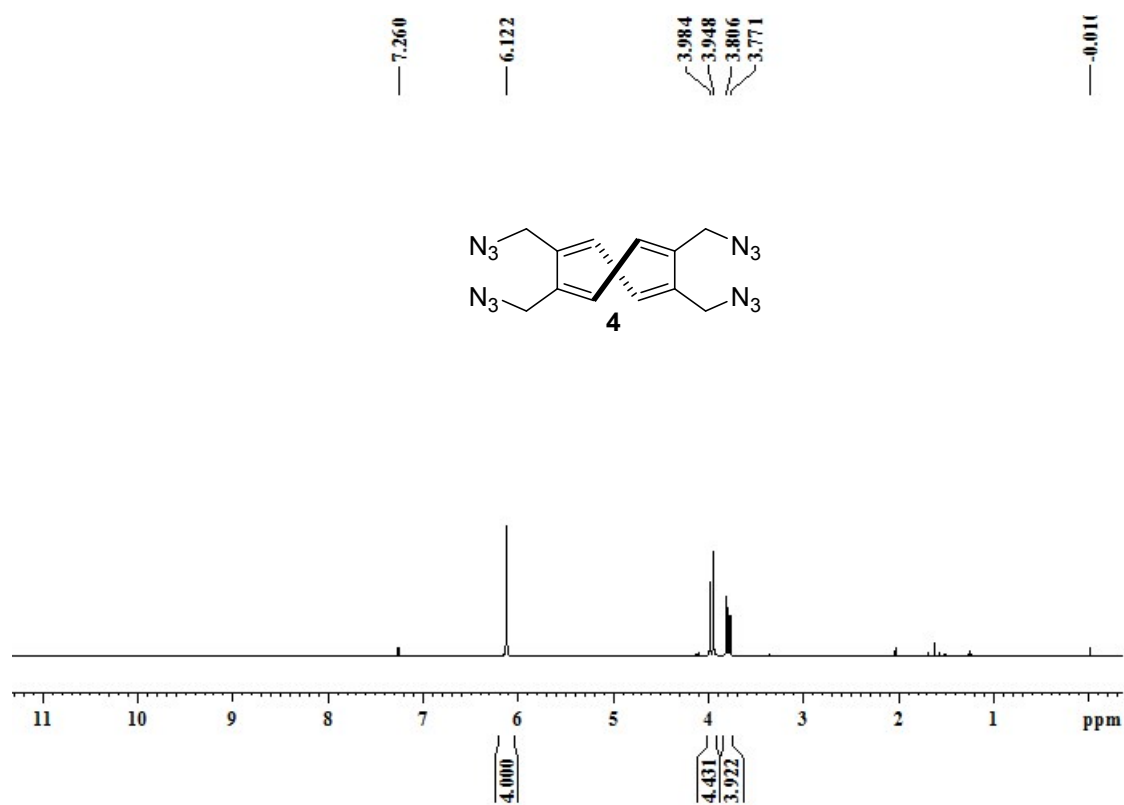

Figure 1 400 MHz <sup>1</sup>H NMR spectrum of **4** in CDCl<sub>3</sub>

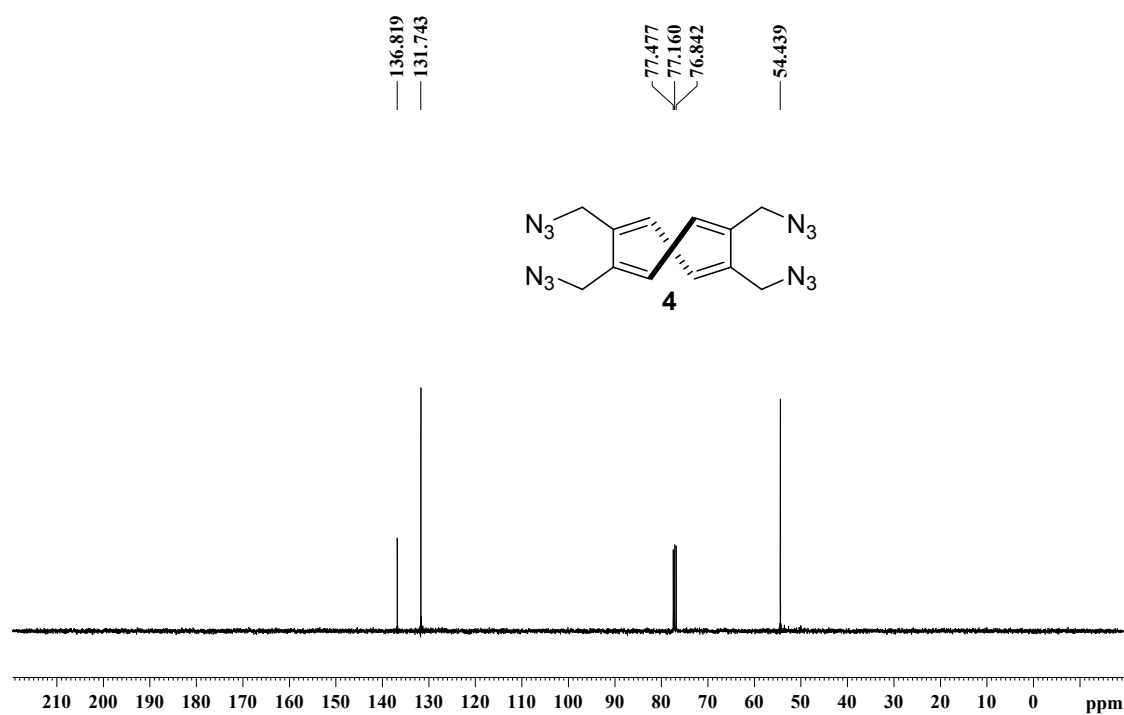

Figure 2 100 MHz <sup>13</sup>C NMR spectrum of **4** in CDCl<sub>3</sub>

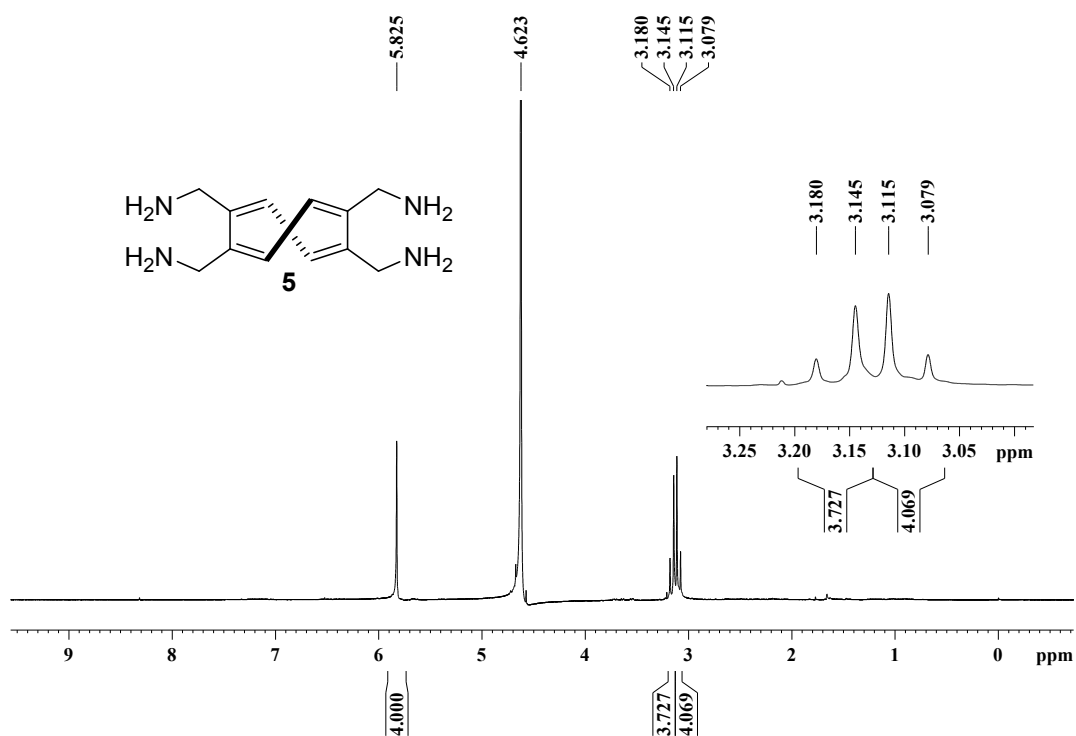

Figure 3 400 MHz  $^1\text{H}$  NMR spectrum of **4** in  $\text{D}_2\text{O}$ .

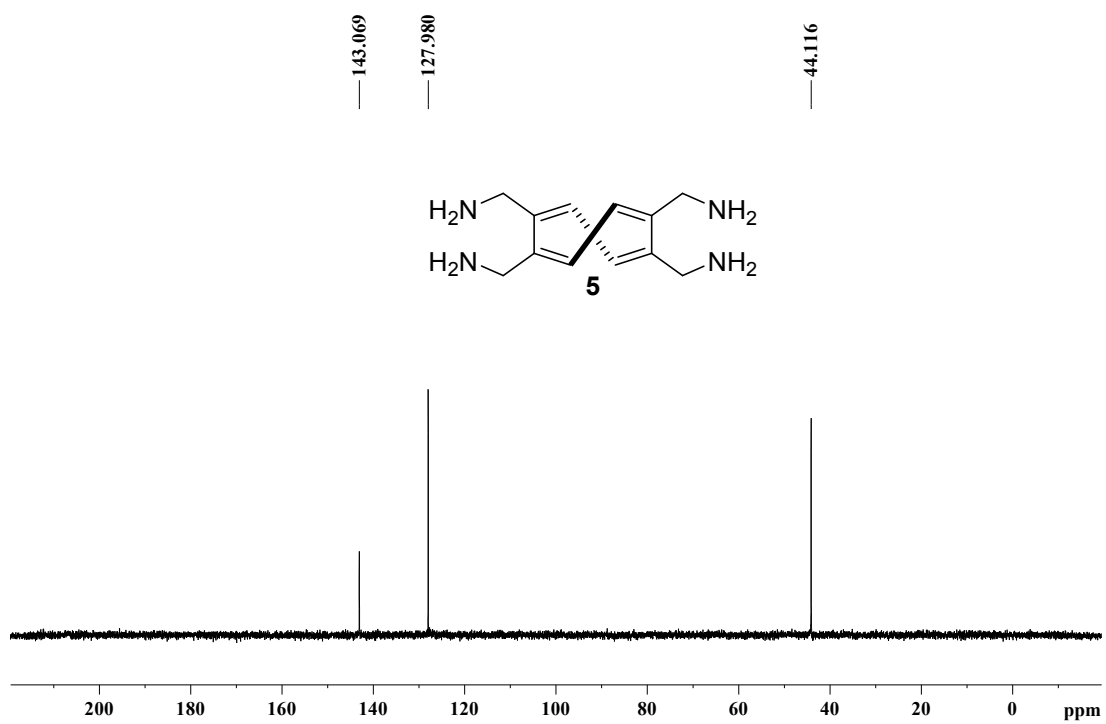

Figure 3 100 MHz  $^{13}\text{C}$  NMR spectrum of **5** in  $\text{D}_2\text{O}$ .

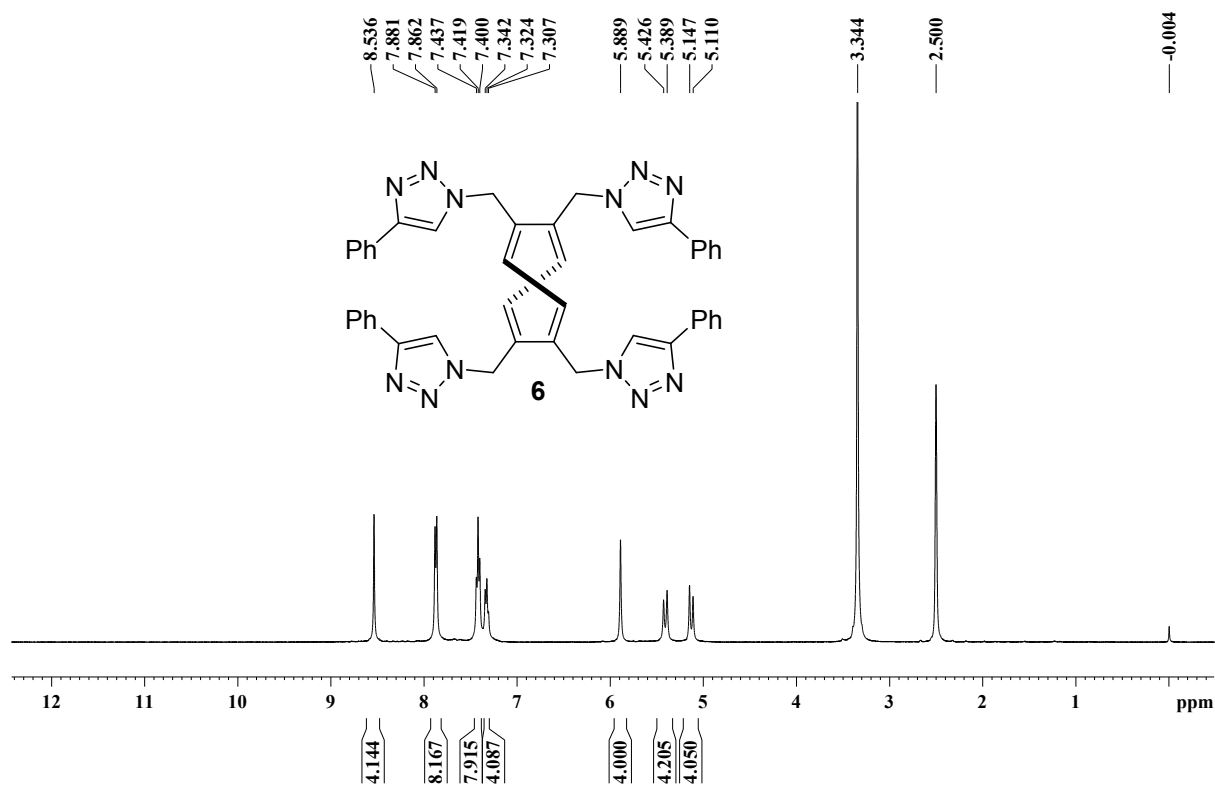

Figure 4 400 MHz  $^1\text{H}$  NMR spectrum of **6** in  $\text{CDCl}_3$ .

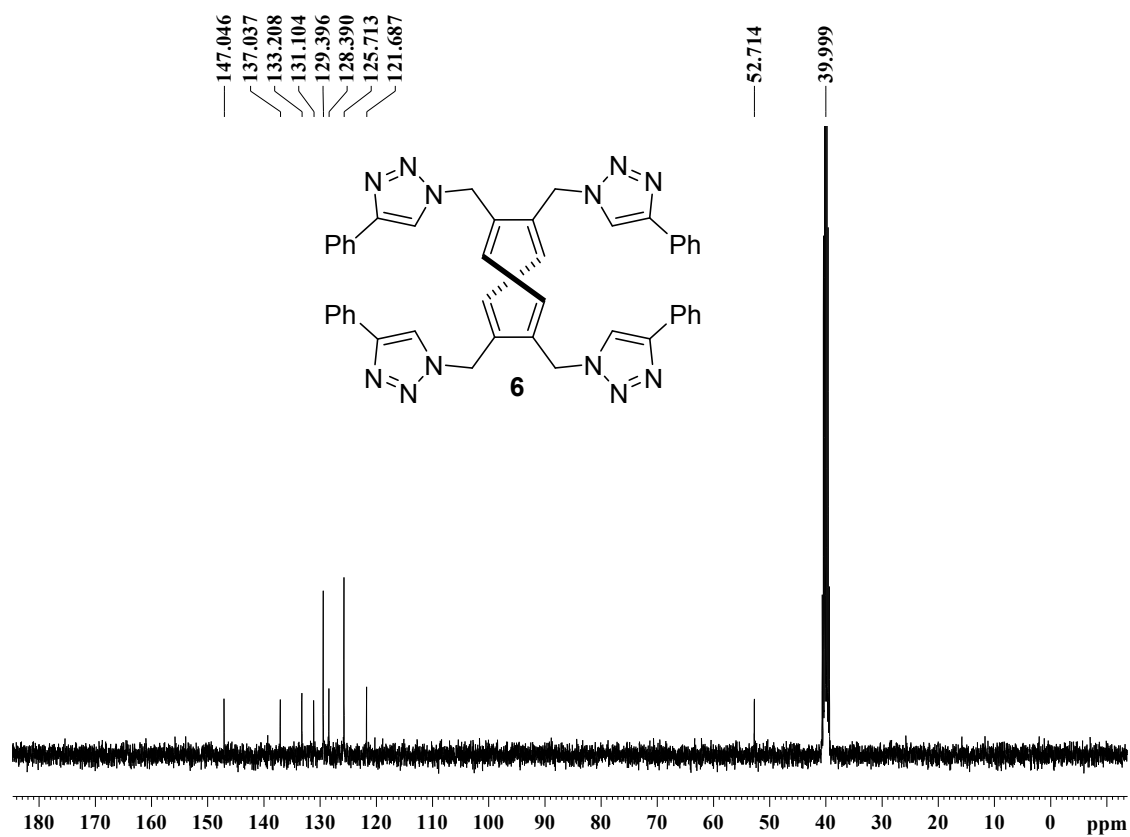

Figure 5 100 MHz  $^{13}\text{C}$  NMR spectrum of **6** in  $\text{CDCl}_3$ .

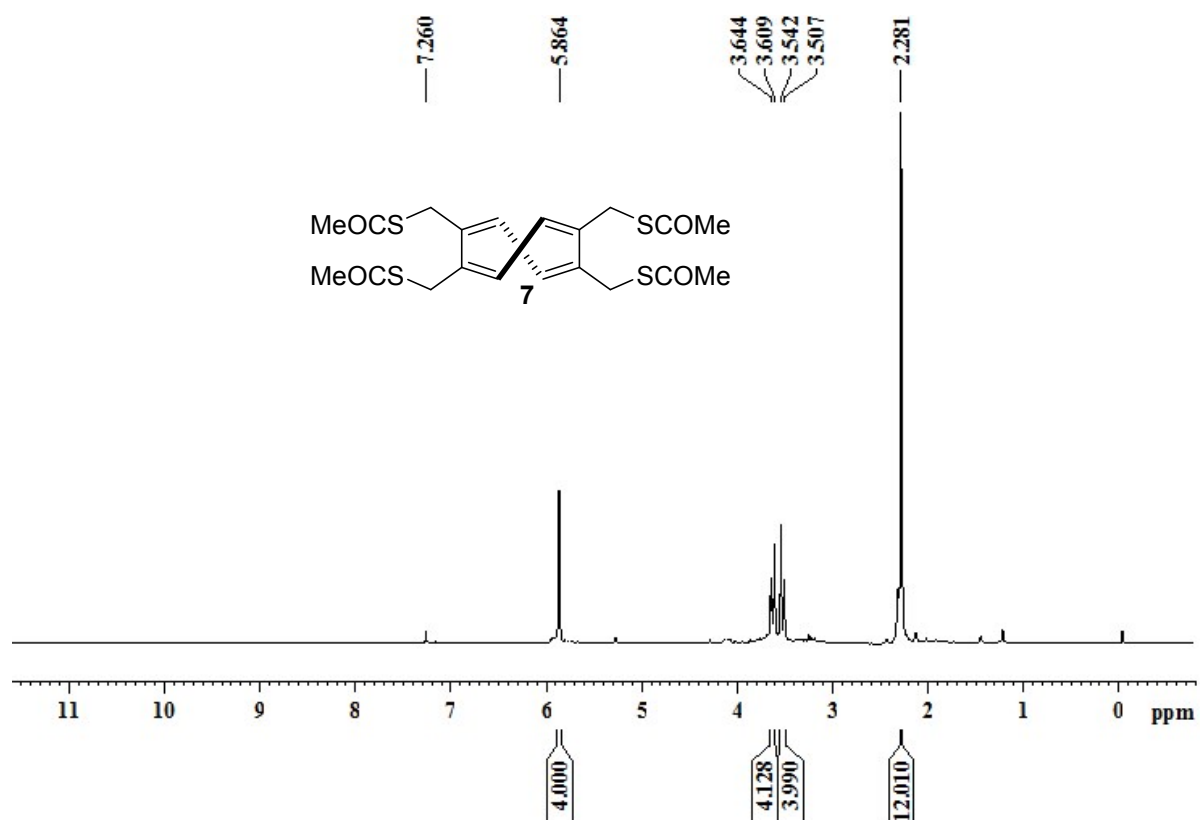

Figure 6 400 MHz <sup>1</sup>H NMR spectrum of **7** in CDCl<sub>3</sub>.

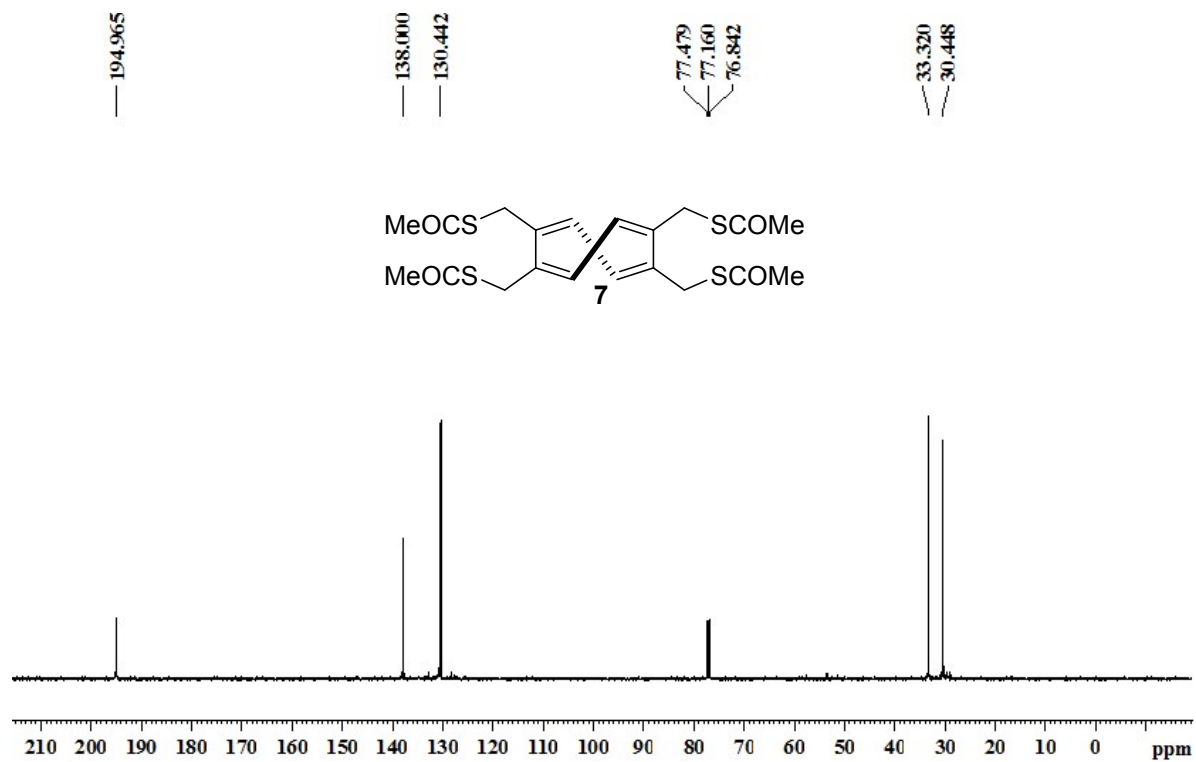

Figure 7 100 MHz <sup>13</sup>C NMR spectrum of **7** in CDCl<sub>3</sub>.

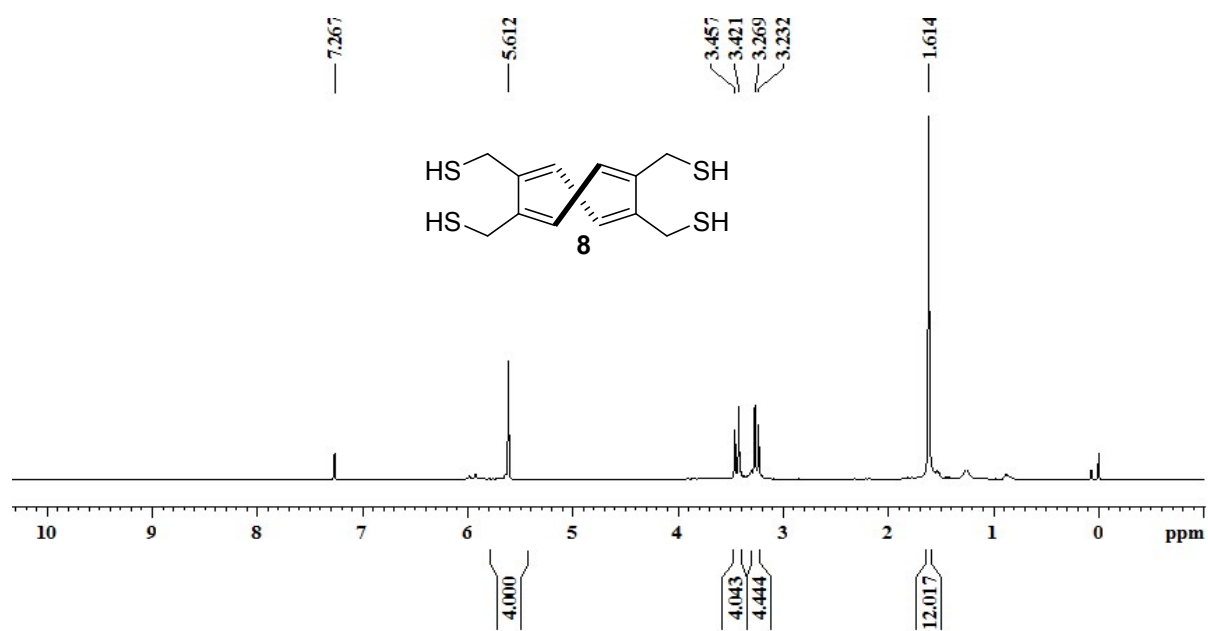

Figure 8 400 MHz <sup>1</sup>H NMR spectrum of **8** in CDCl<sub>3</sub>.

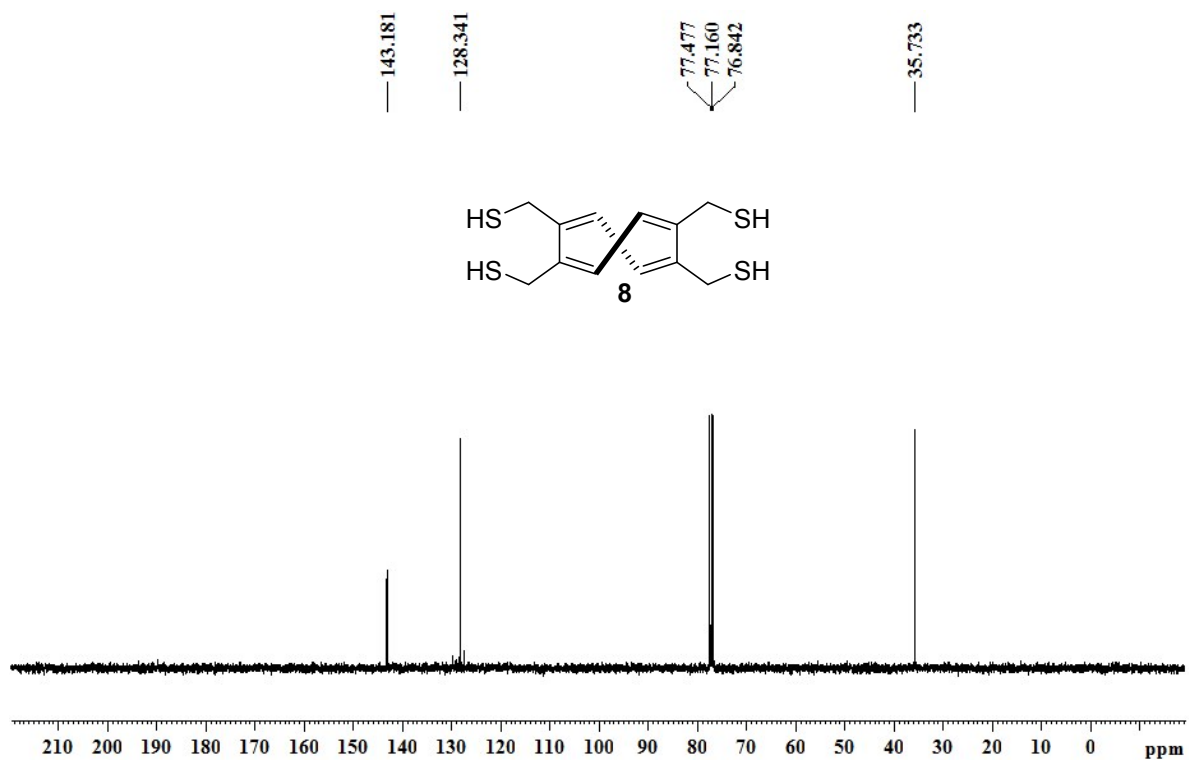

Figure 9 100 MHz <sup>13</sup>C NMR spectrum of **8** in CDCl<sub>3</sub>.

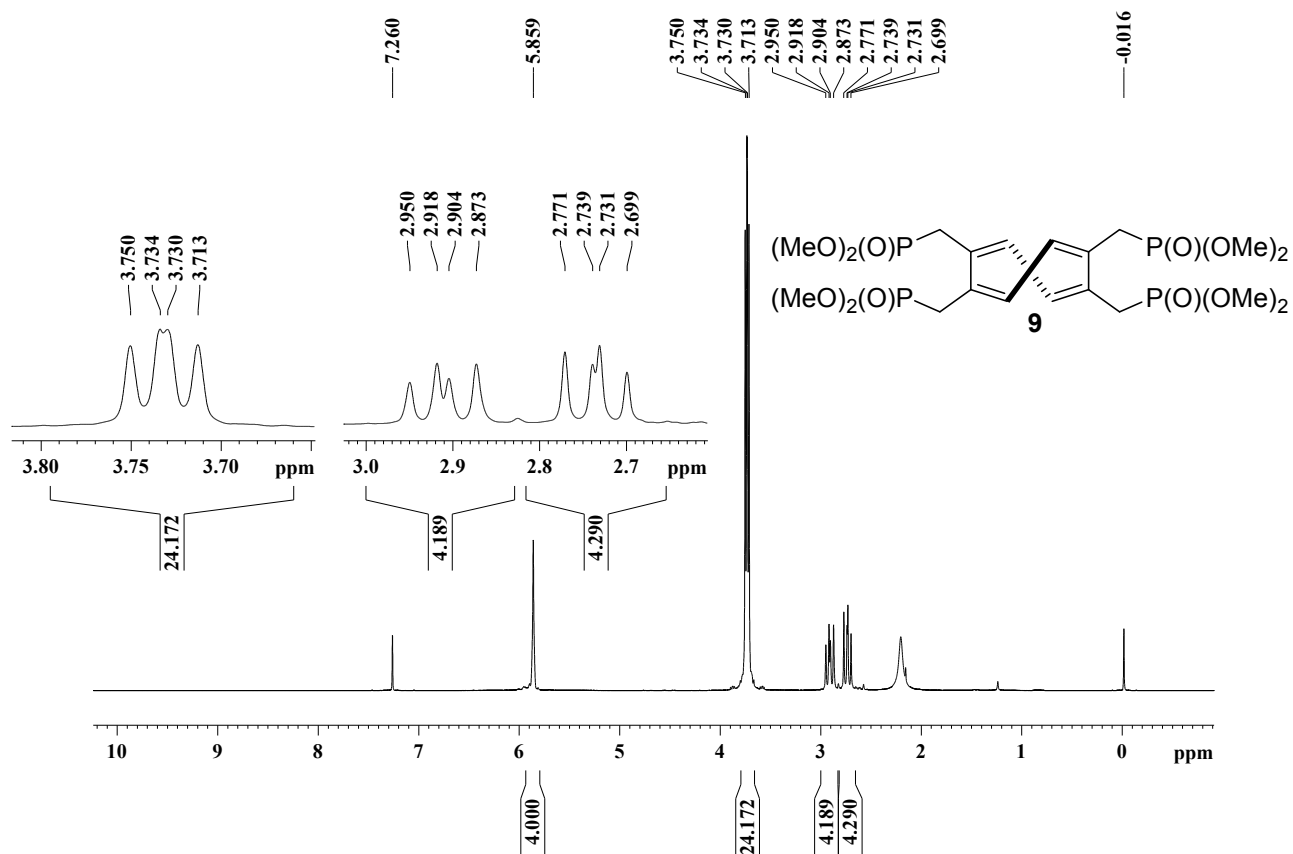

**Figure 10** 400 MHz  $^1\text{H}$  NMR spectrum of **9** in  $\text{CDCl}_3$ .

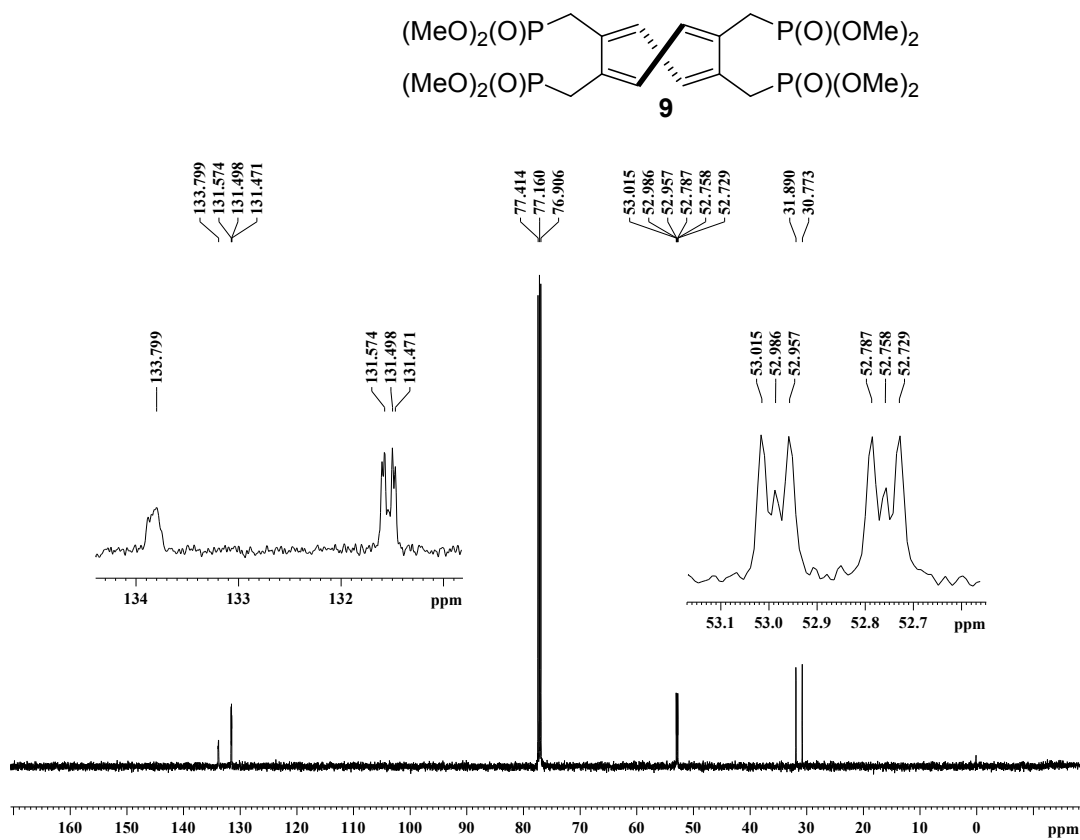

**Figure 11** 100 MHz  $^{13}\text{C}$  NMR spectrum of **9** in  $\text{CDCl}_3$ .

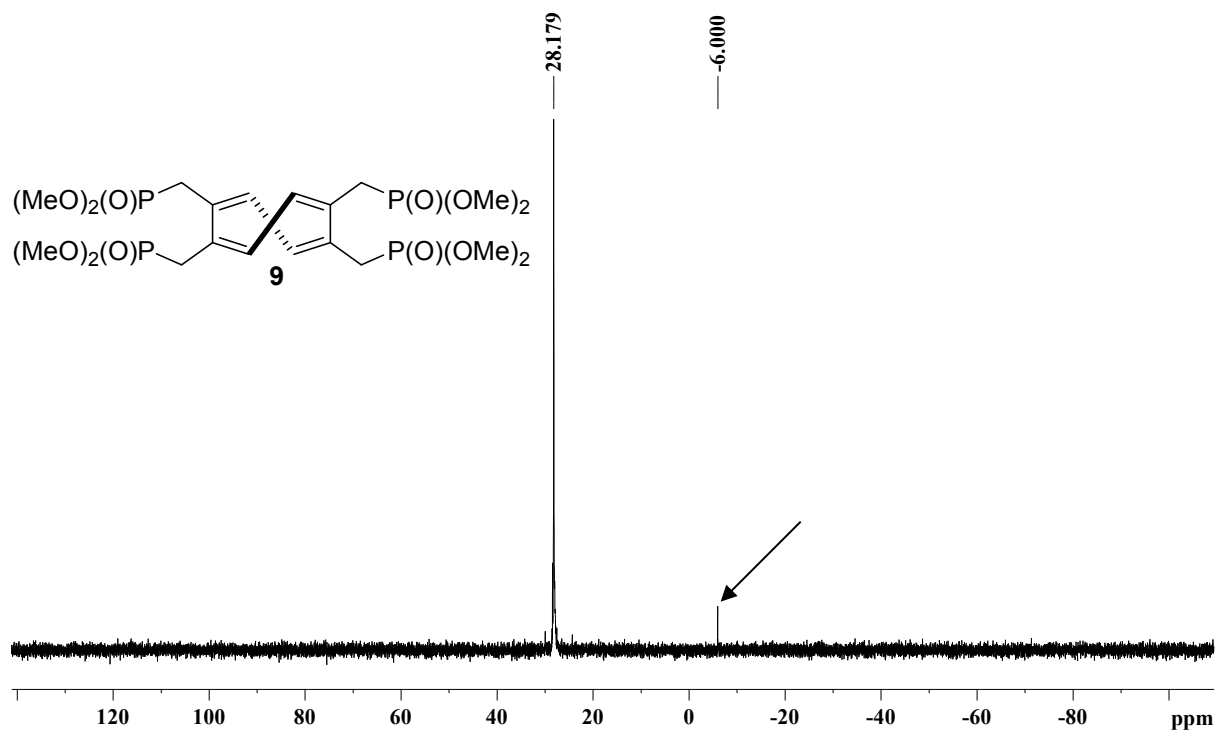

**Figure 12** 202 MHz  $^{31}\text{P}$  NMR of **9** in  $\text{CDCl}_3$  with  $\text{PPh}_3$  as internal standard (pointed by the arrow)



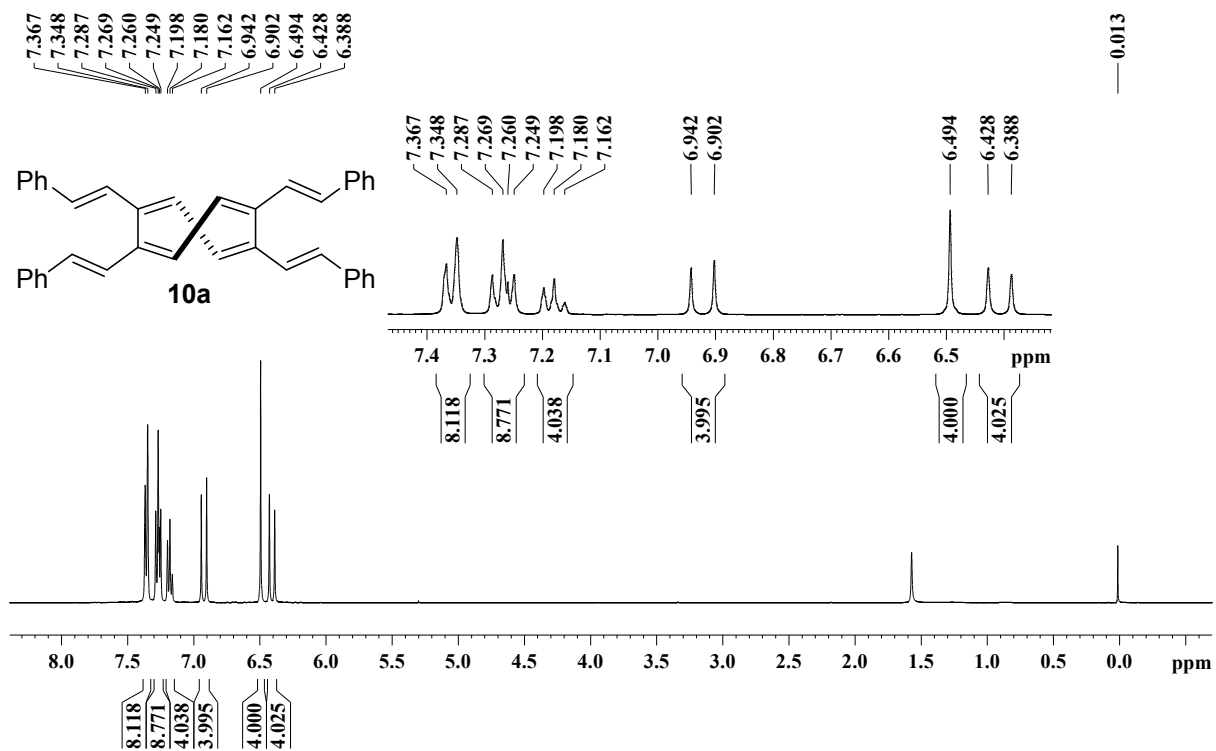

Figure 13 400 MHz  $^1\text{H}$  NMR spectrum of **10a** in  $\text{CDCl}_3$ .

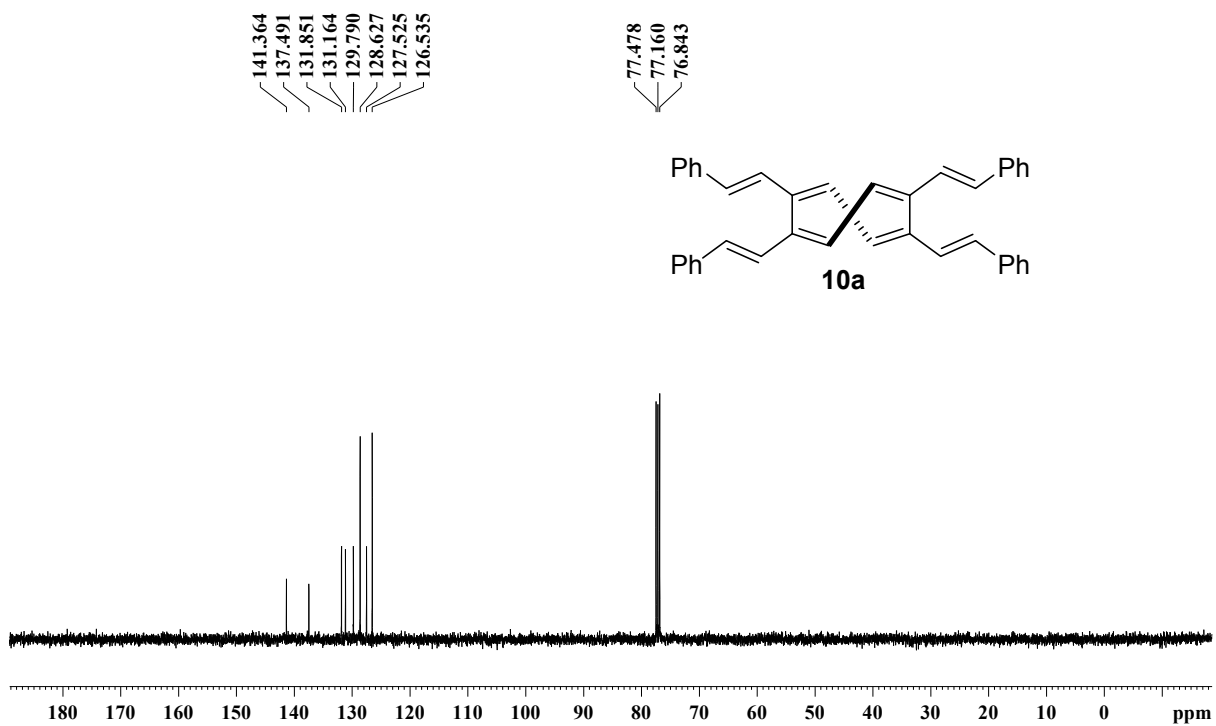

Figure 14 100 MHz  $^{13}\text{C}$  NMR spectrum of **10a** in  $\text{CDCl}_3$ .

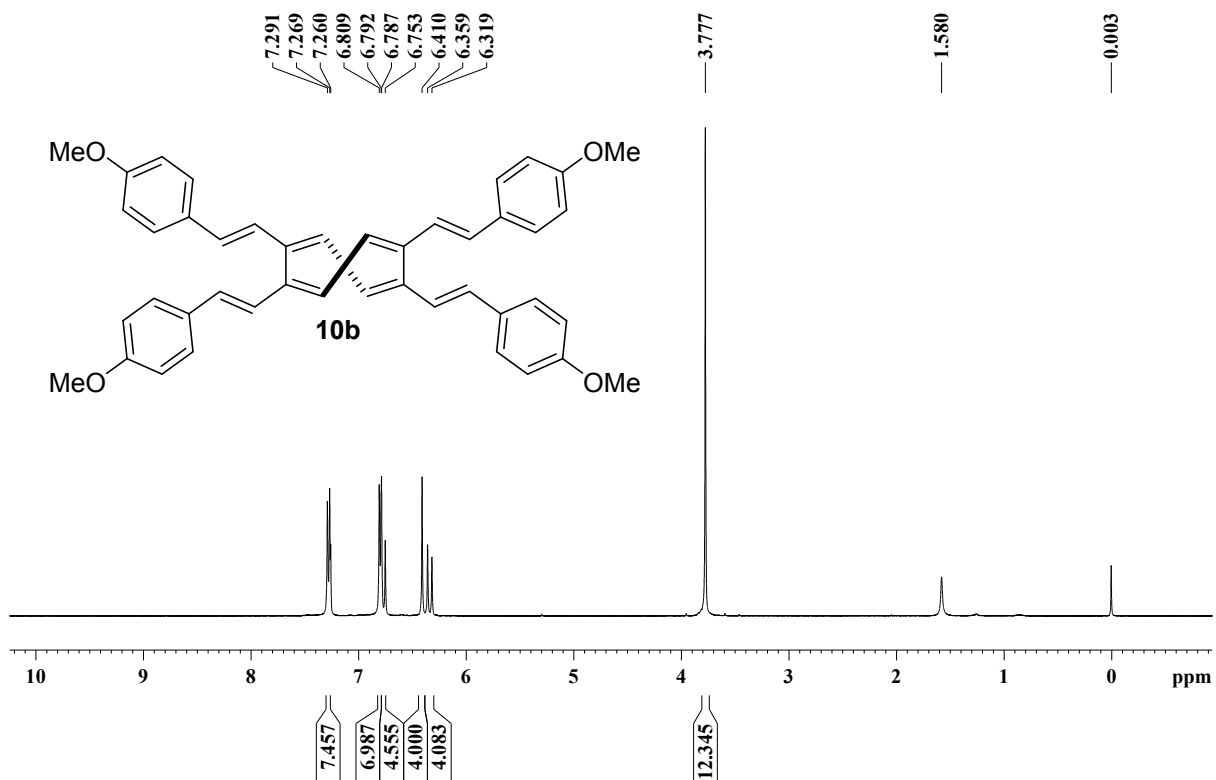

Figure 15 400 MHz  $^1\text{H}$  NMR spectrum of **10b** in  $\text{CDCl}_3$ .

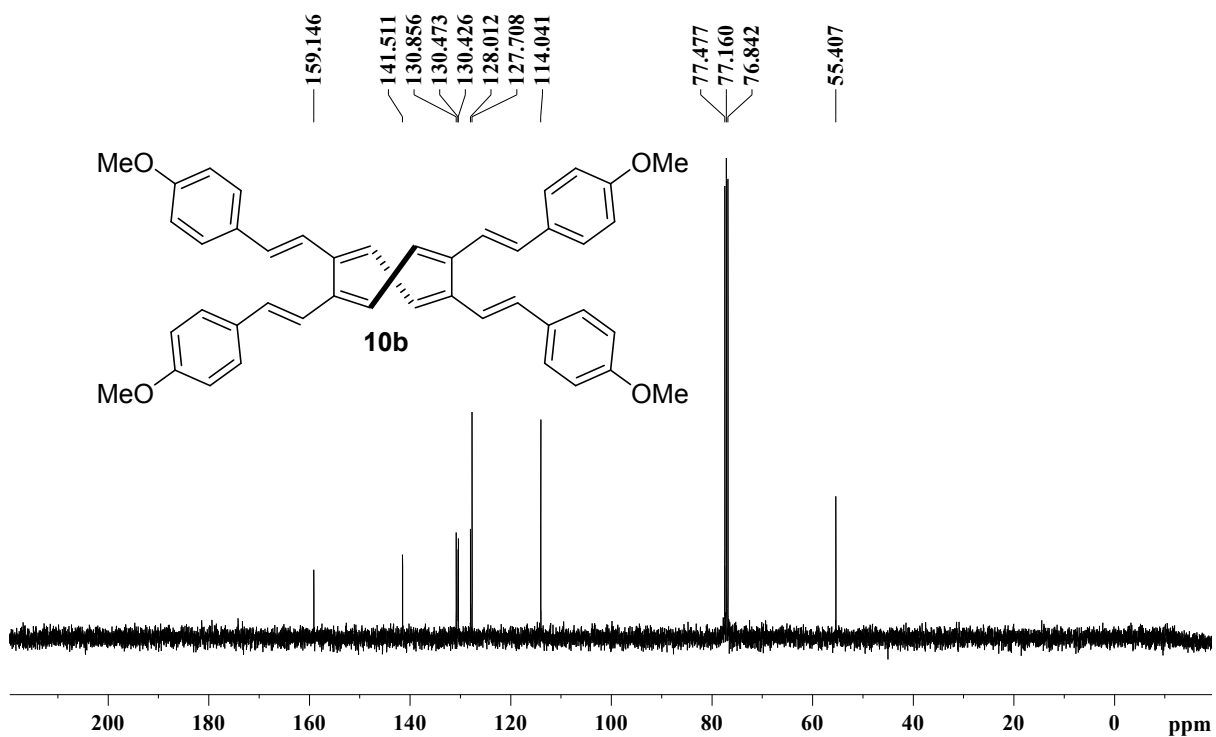

Figure 16 100 MHz  $^{13}\text{C}$  NMR spectrum of **10b** in  $\text{CDCl}_3$ .

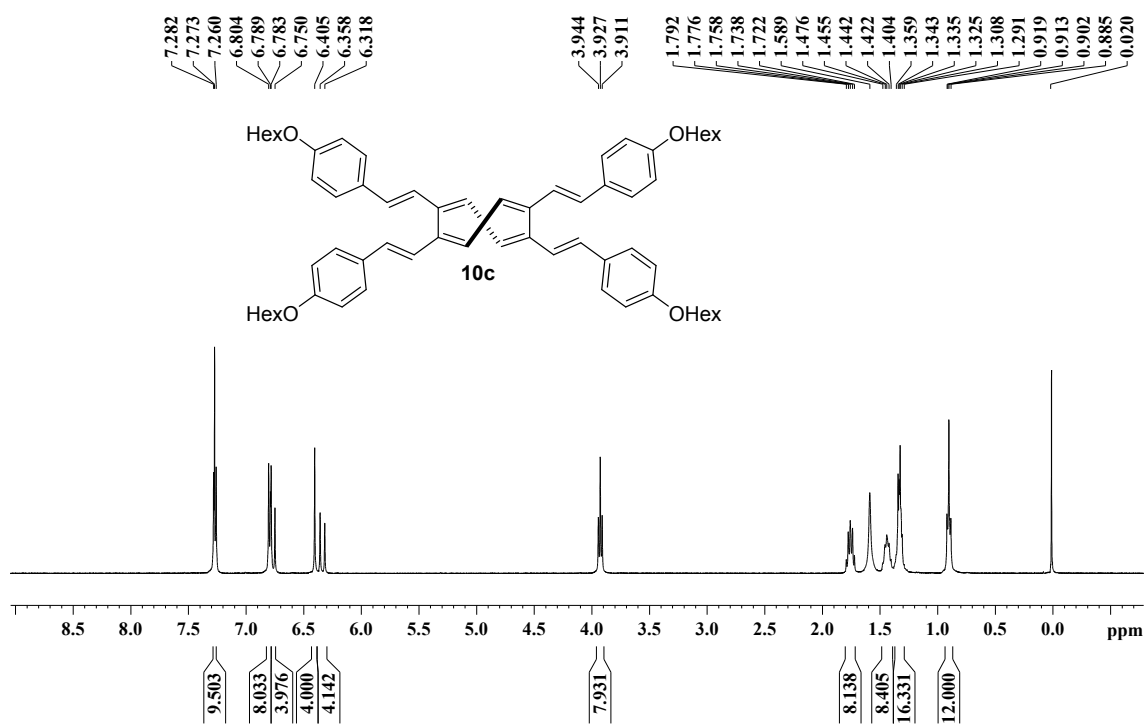

Figure 17 400 MHz  $^1\text{H}$  NMR spectrum of **10c** in  $\text{CDCl}_3$ .

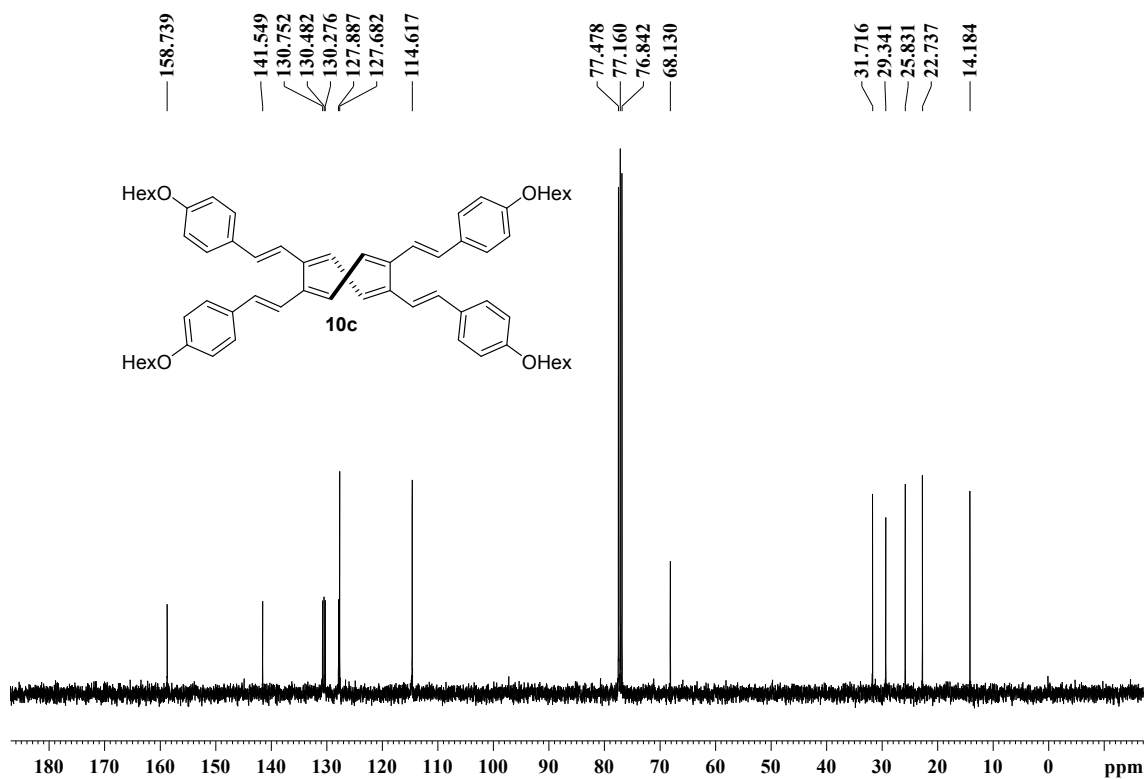

Figure 18 100 MHz  $^{13}\text{C}$  NMR spectrum of **10c** in  $\text{CDCl}_3$ .

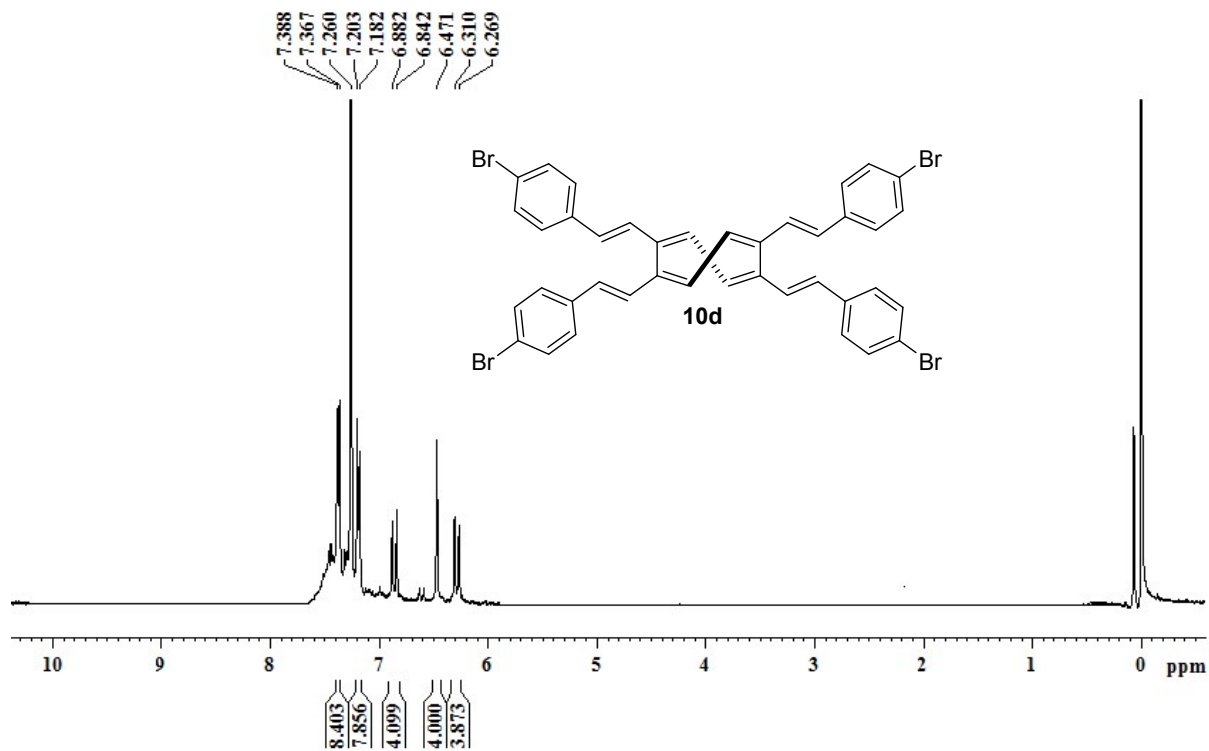

Figure 19 400 MHz  $^1\text{H}$  NMR spectrum of **10d** in  $\text{CDCl}_3$ .

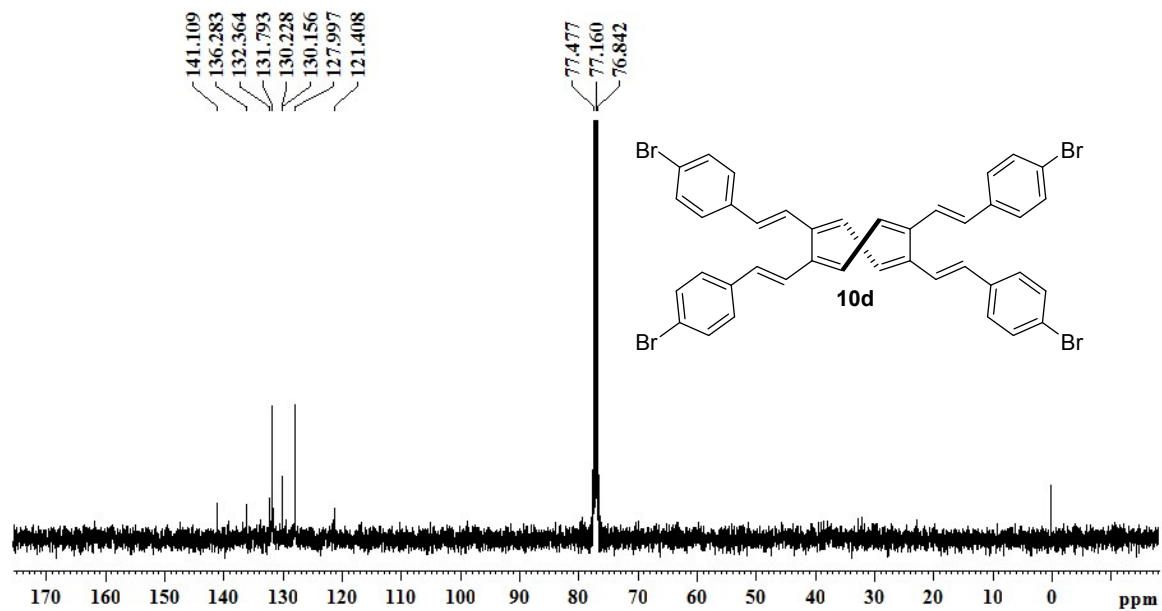

Figure 20 100 MHz  $^{13}\text{C}$  NMR spectrum of **10d** in  $\text{CDCl}_3$ .

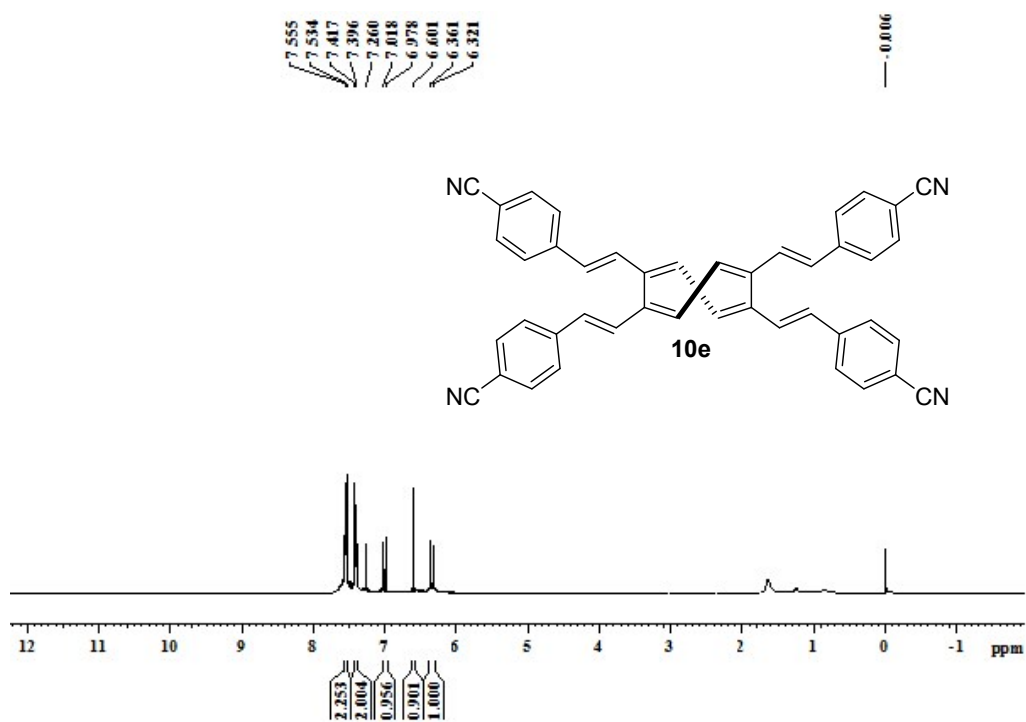

Figure 21 400 MHz <sup>1</sup>H NMR spectrum of **10e** in CDCl<sub>3</sub>.

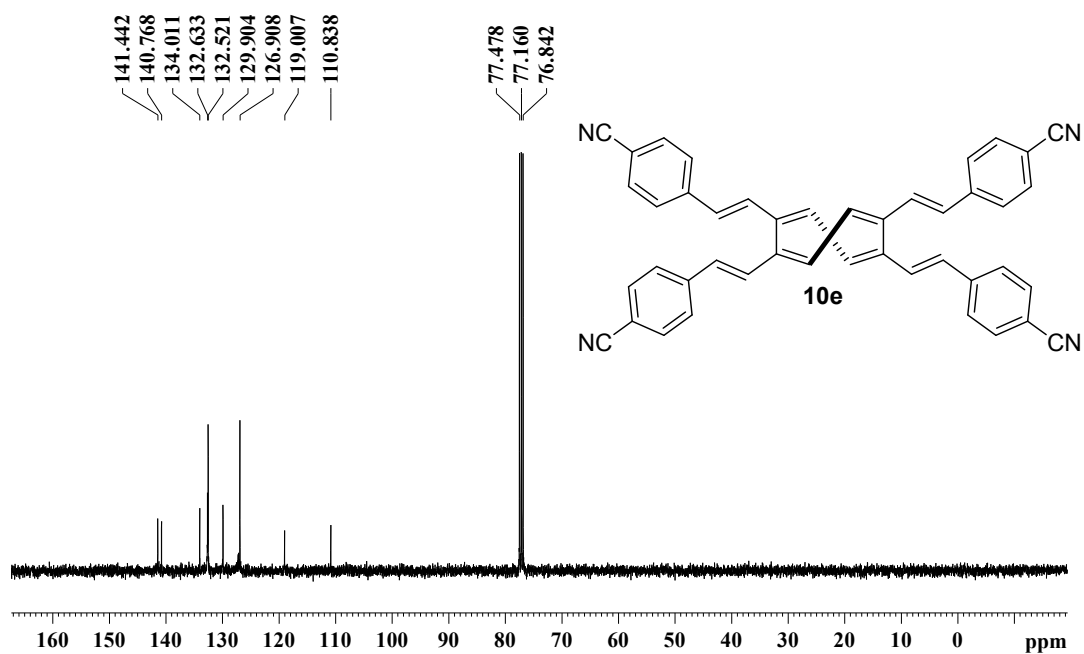

Figure 22 100 MHz <sup>13</sup>C NMR spectrum of **10e** in CDCl<sub>3</sub>.

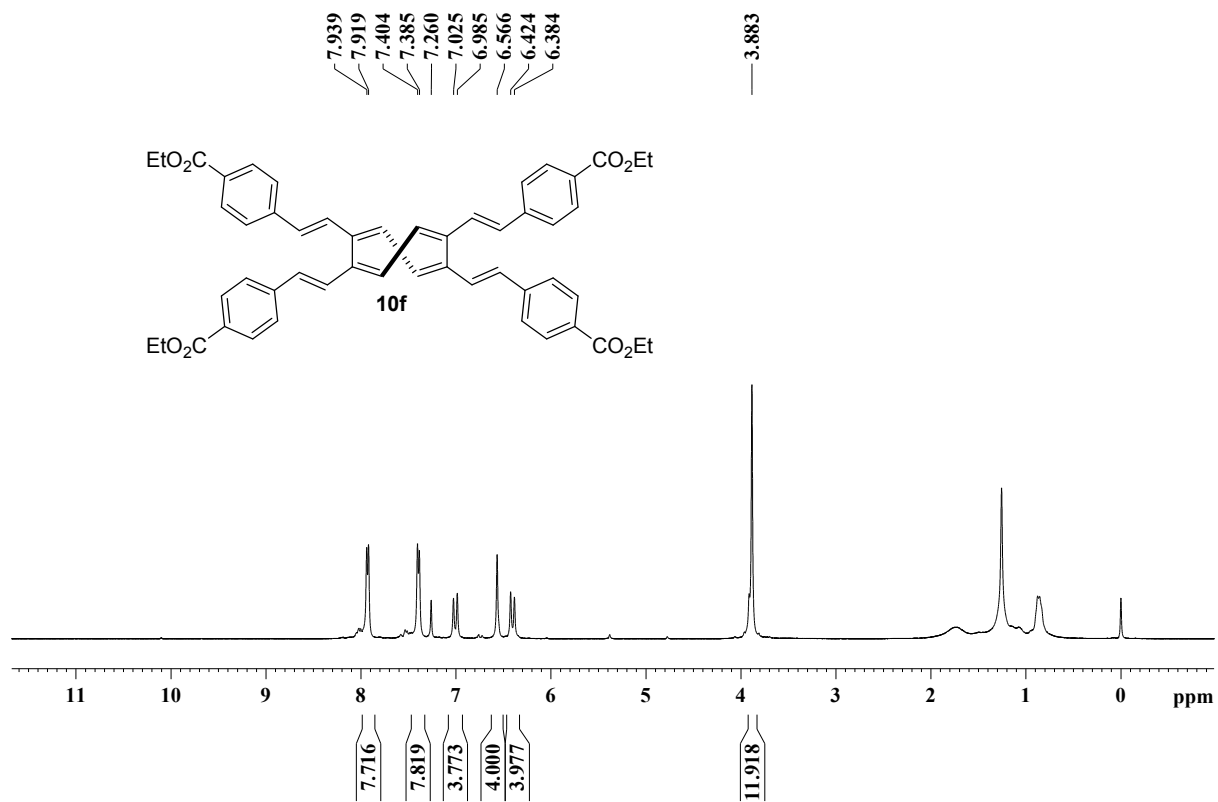

Figure 23 400 MHz  $^1\text{H}$  NMR spectrum of **10f** in  $\text{CDCl}_3$ .

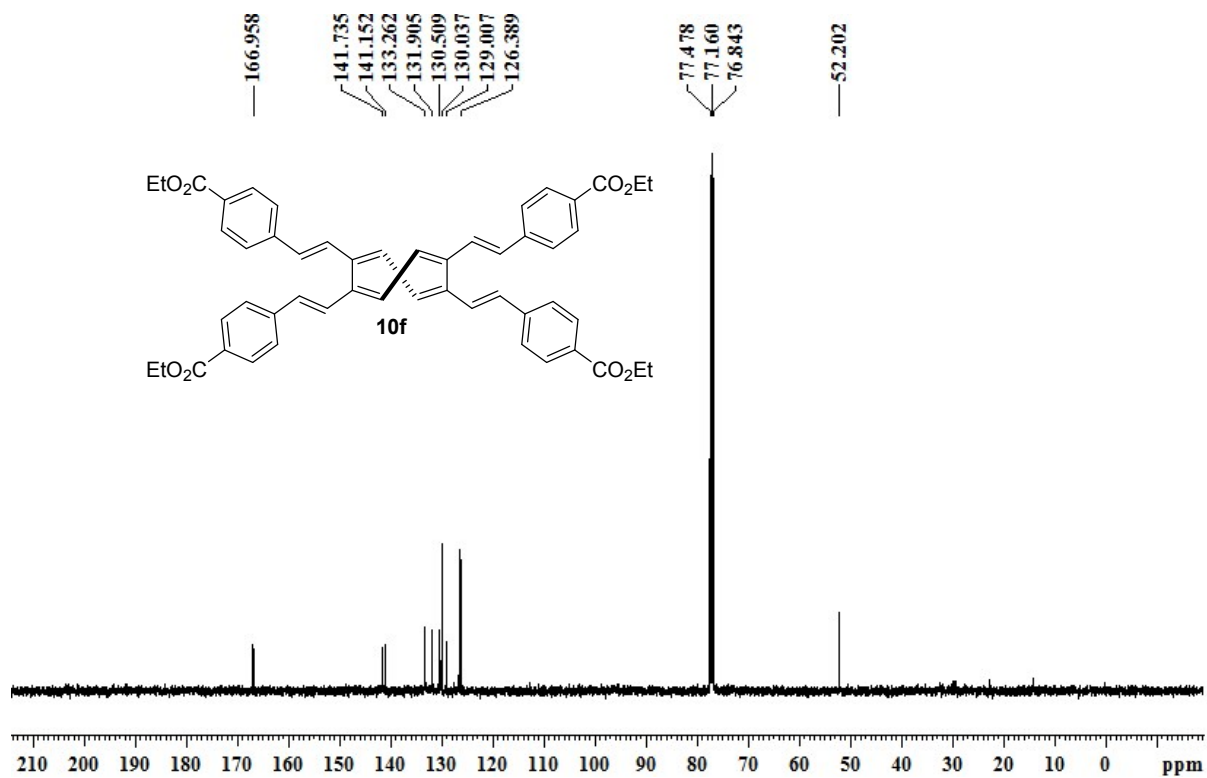

Figure 24 100 MHz  $^{13}\text{C}$  NMR spectrum of **10f** in  $\text{CDCl}_3$ .

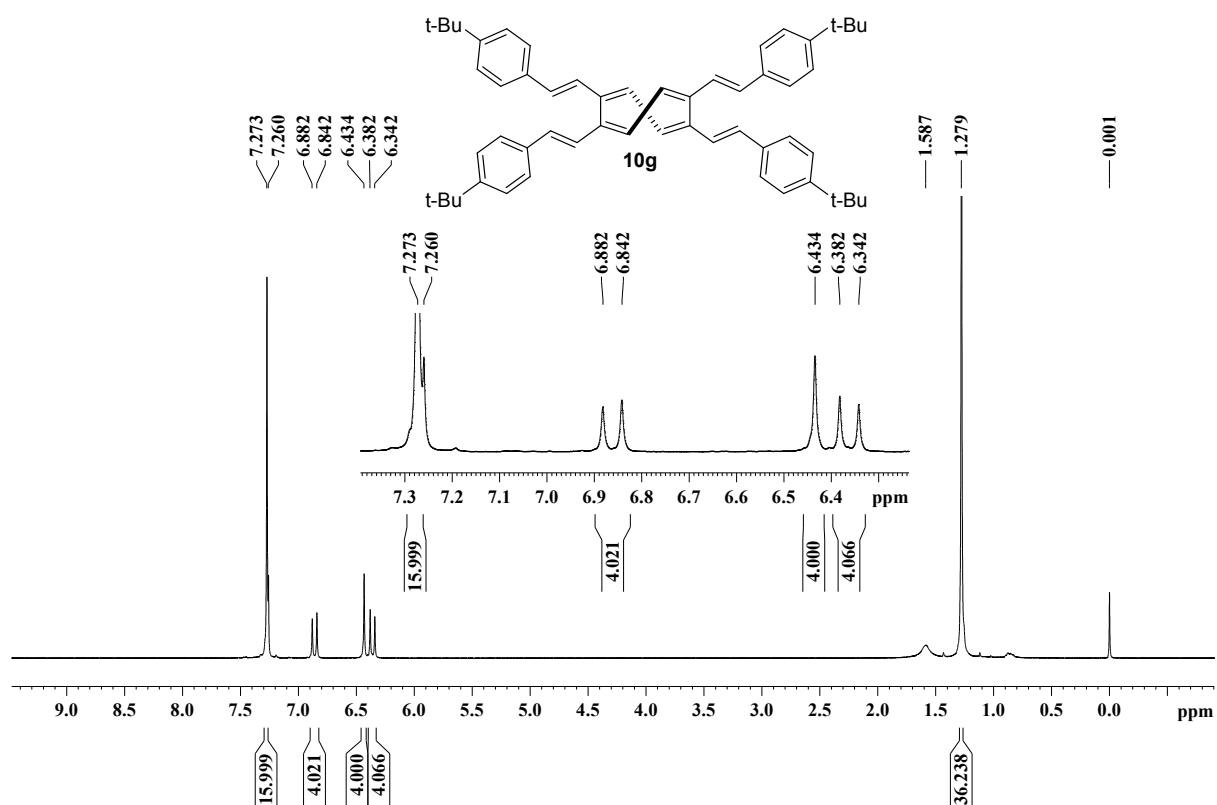

Figure 25 400 MHz  $^1\text{H}$  NMR spectrum of **10g** in  $\text{CDCl}_3$ .

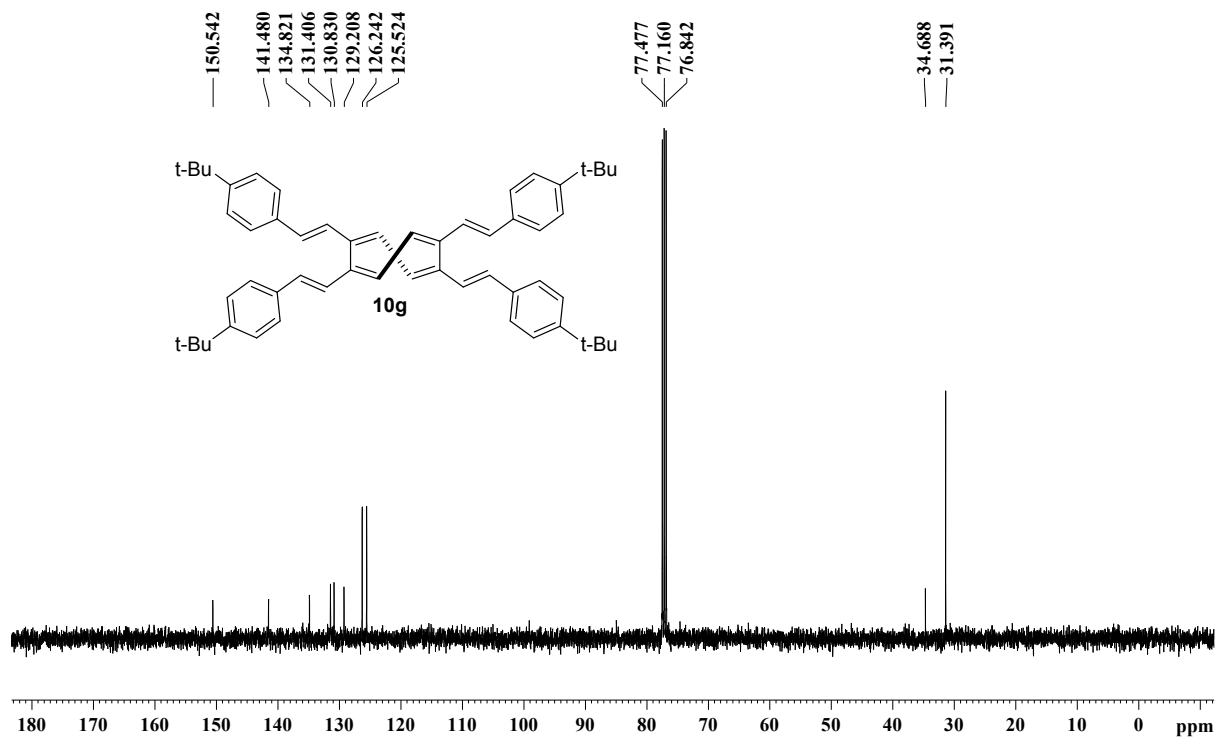

Figure 26 100 MHz  $^{13}\text{C}$  NMR spectrum of **10g** in  $\text{CDCl}_3$ .

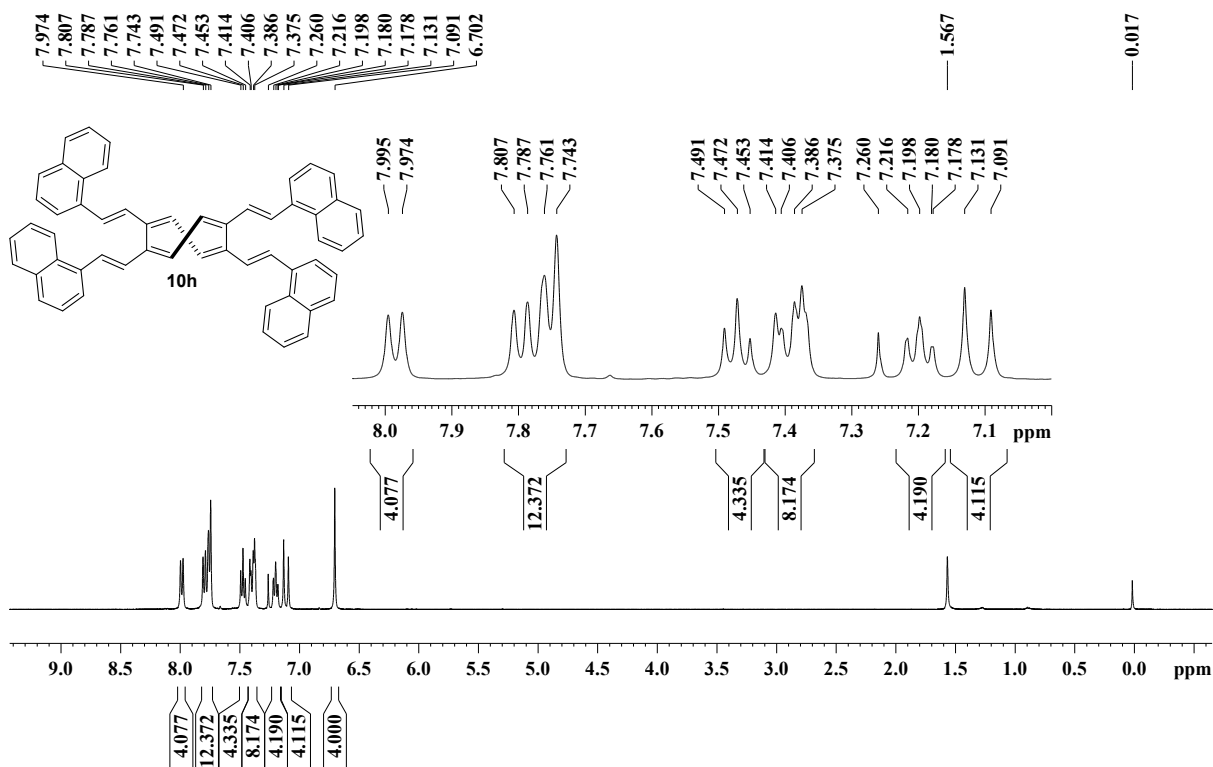

Figure 27 400 MHz  $^1\text{H}$  NMR spectrum of **10h** in  $\text{CDCl}_3$ .

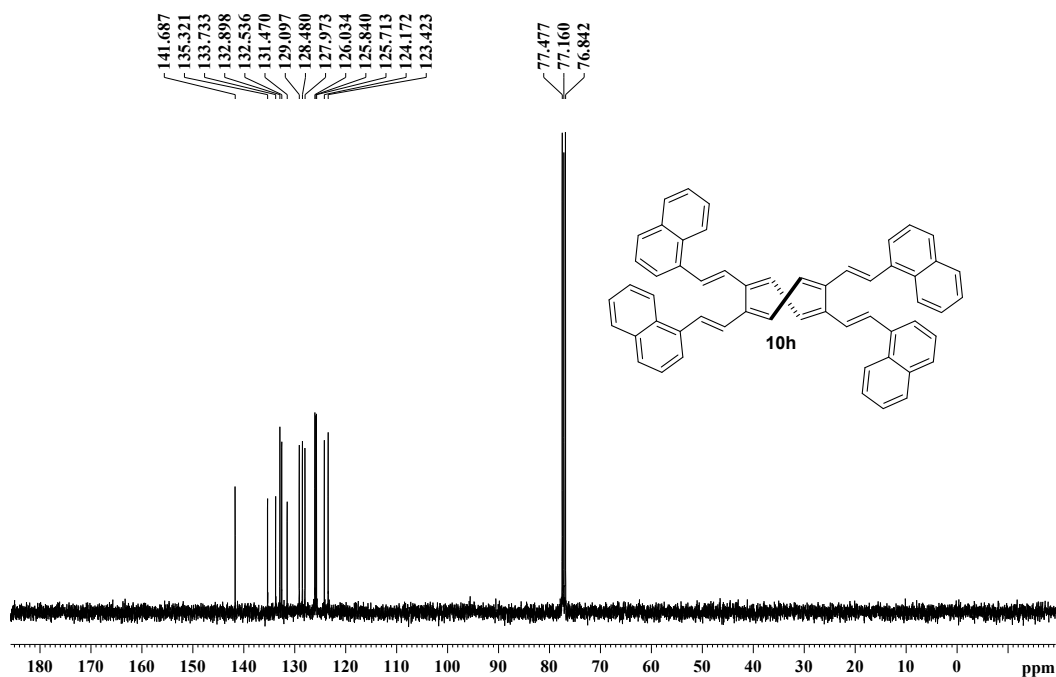

Figure 28 100 MHz  $^{13}\text{C}$  NMR spectrum of **10h** in  $\text{CDCl}_3$ .



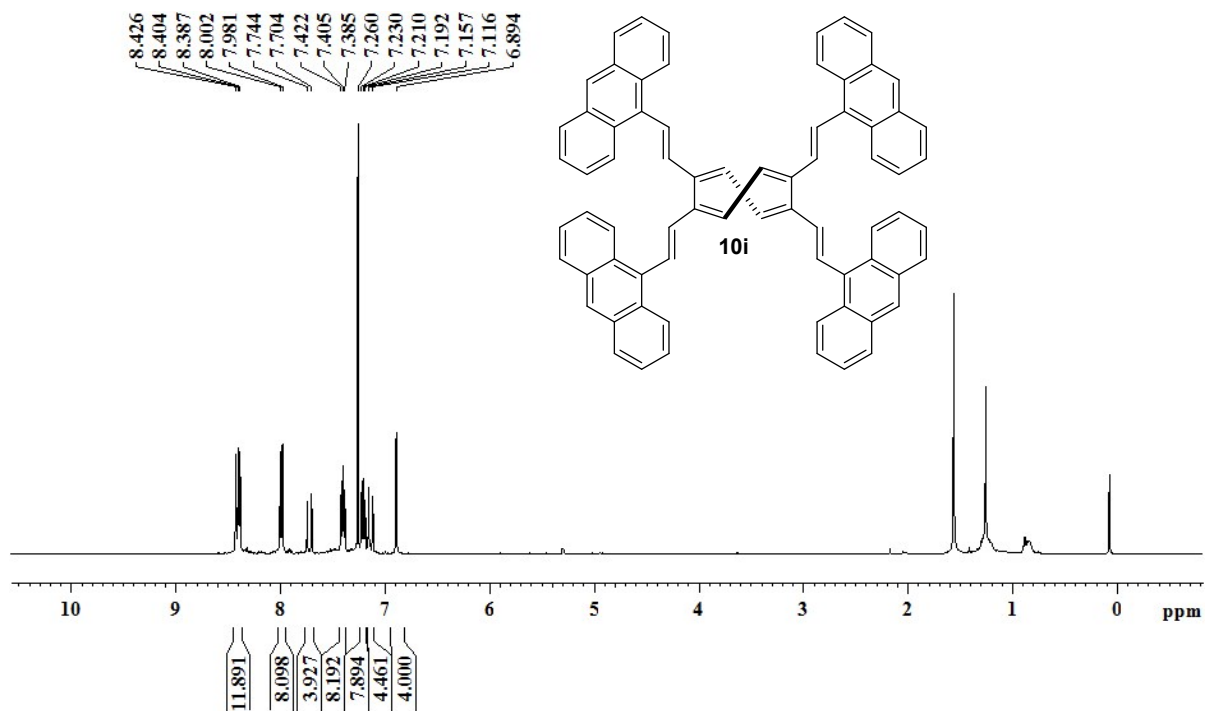

Figure 29 400 MHz  $^1\text{H}$  NMR spectrum of **10i** in  $\text{CDCl}_3$ .

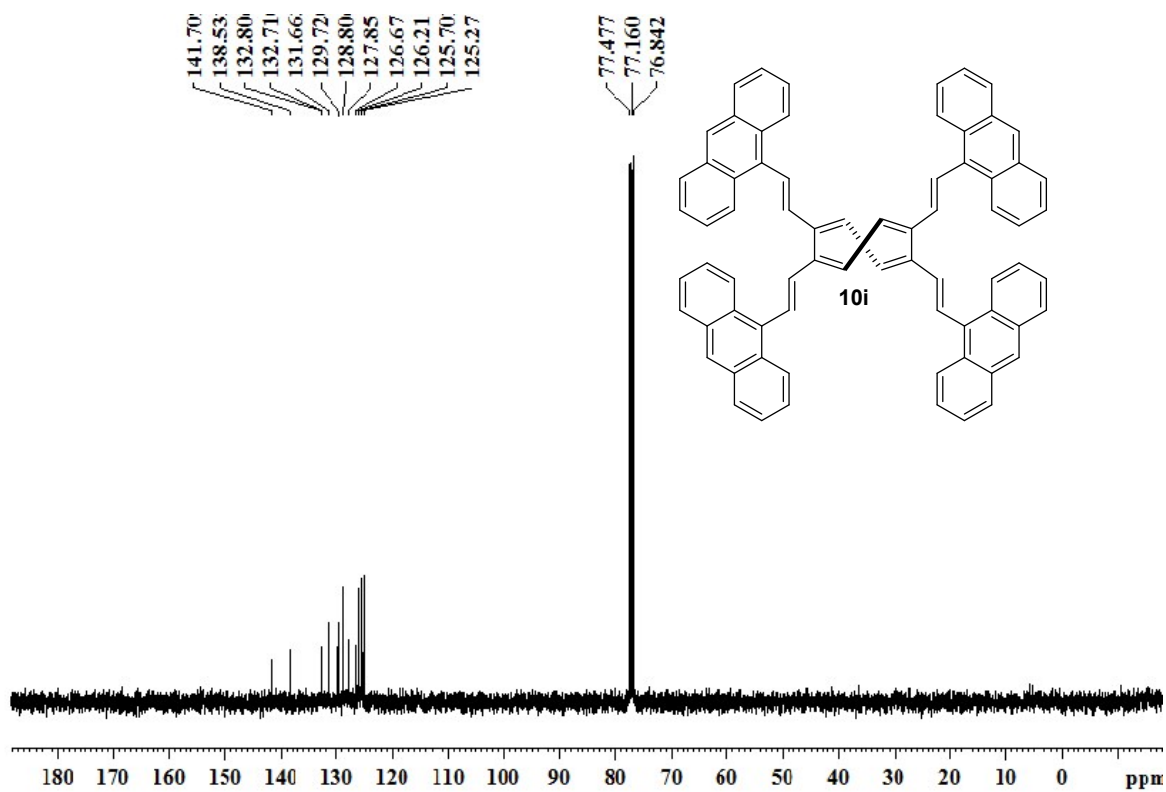

Figure 30 100 MHz  $^{13}\text{C}$  NMR spectrum of **10i** in  $\text{CDCl}_3$ .

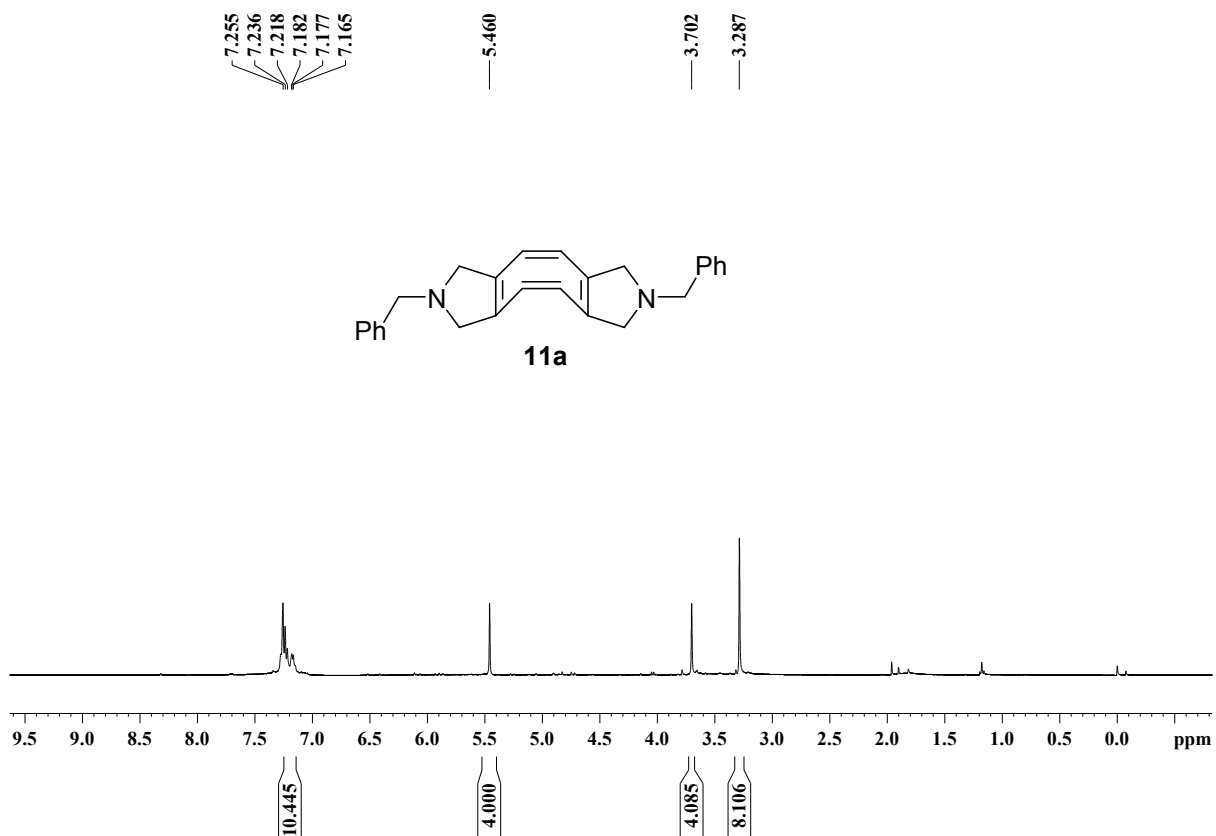

Figure 31 400 MHz  $^1\text{H}$  NMR spectrum of **11a** in  $\text{CDCl}_3$ .

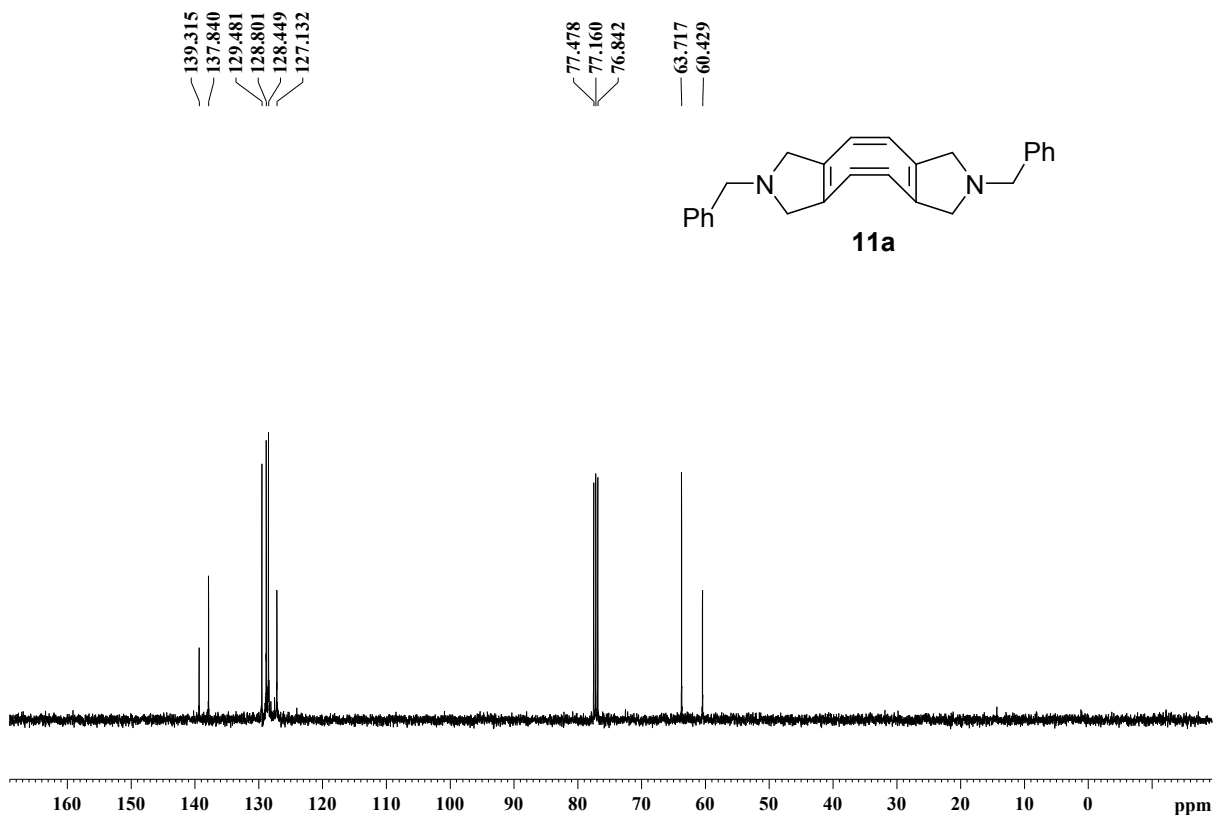

Figure 32 100 MHz  $^{13}\text{C}$  NMR spectrum of **11a** in  $\text{CDCl}_3$ .

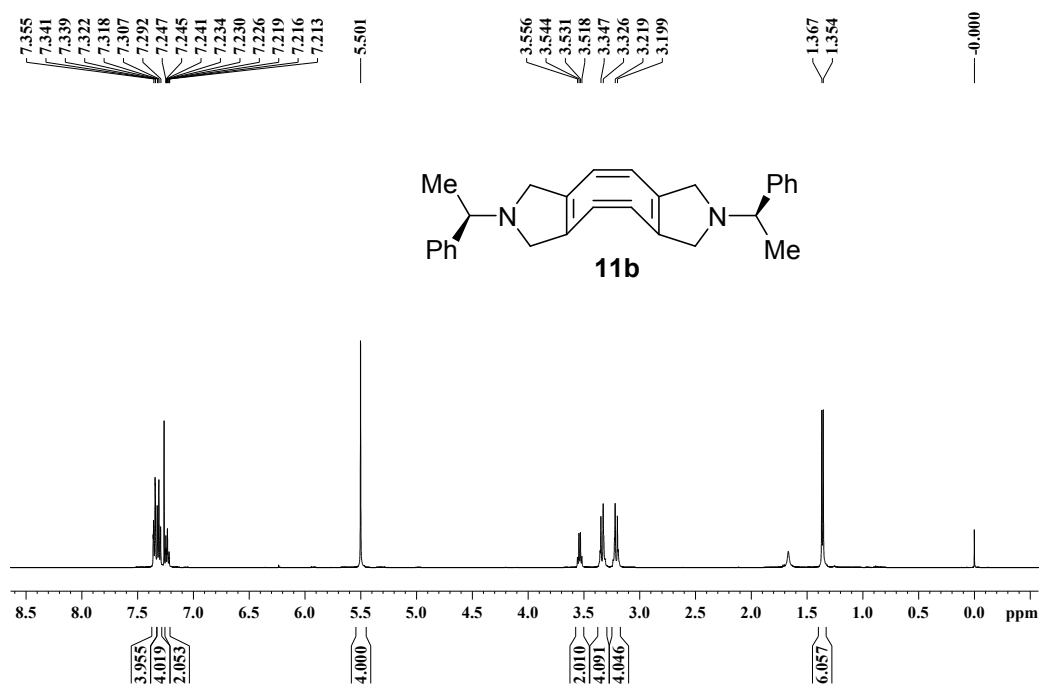

Figure 33 400 MHz <sup>1</sup>H NMR spectrum of **11b** in CDCl<sub>3</sub>.

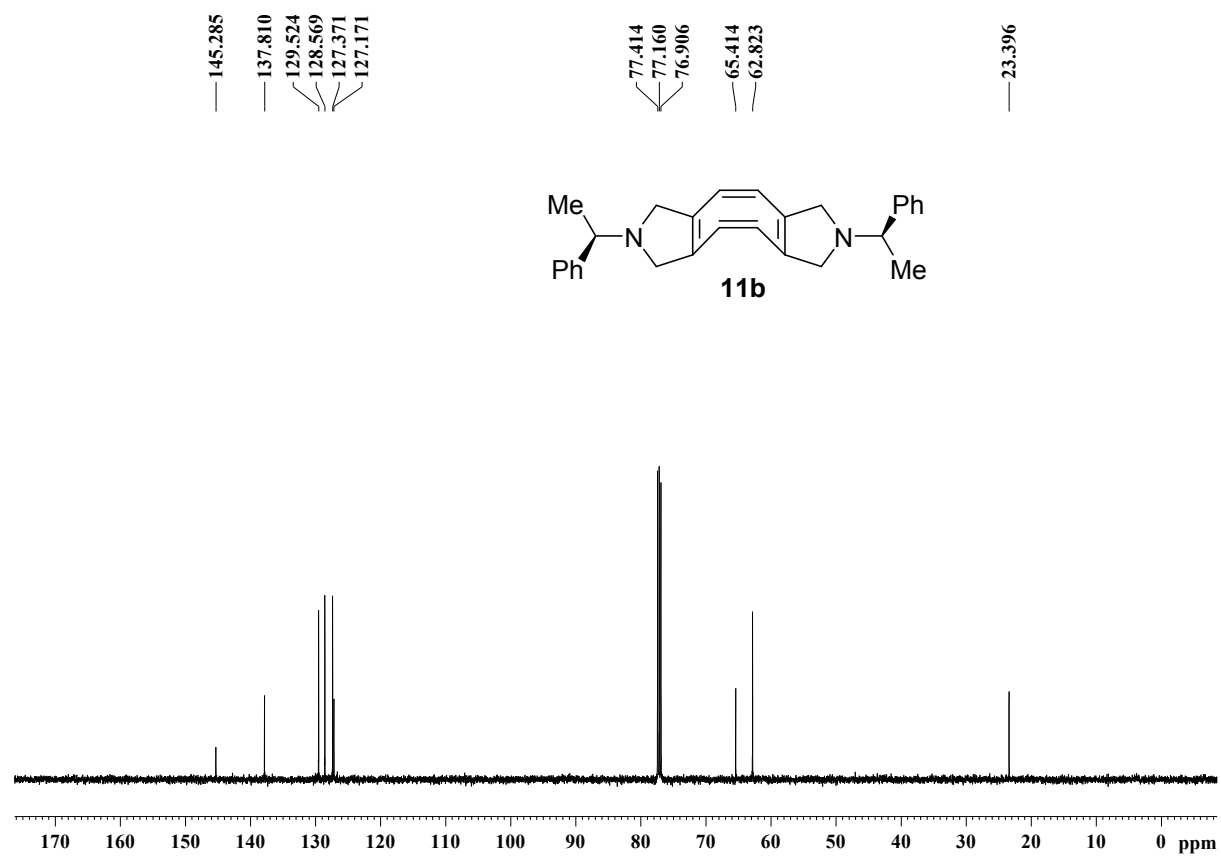

Figure 34 100 MHz <sup>13</sup>C NMR spectrum of **11b** in CDCl<sub>3</sub>.

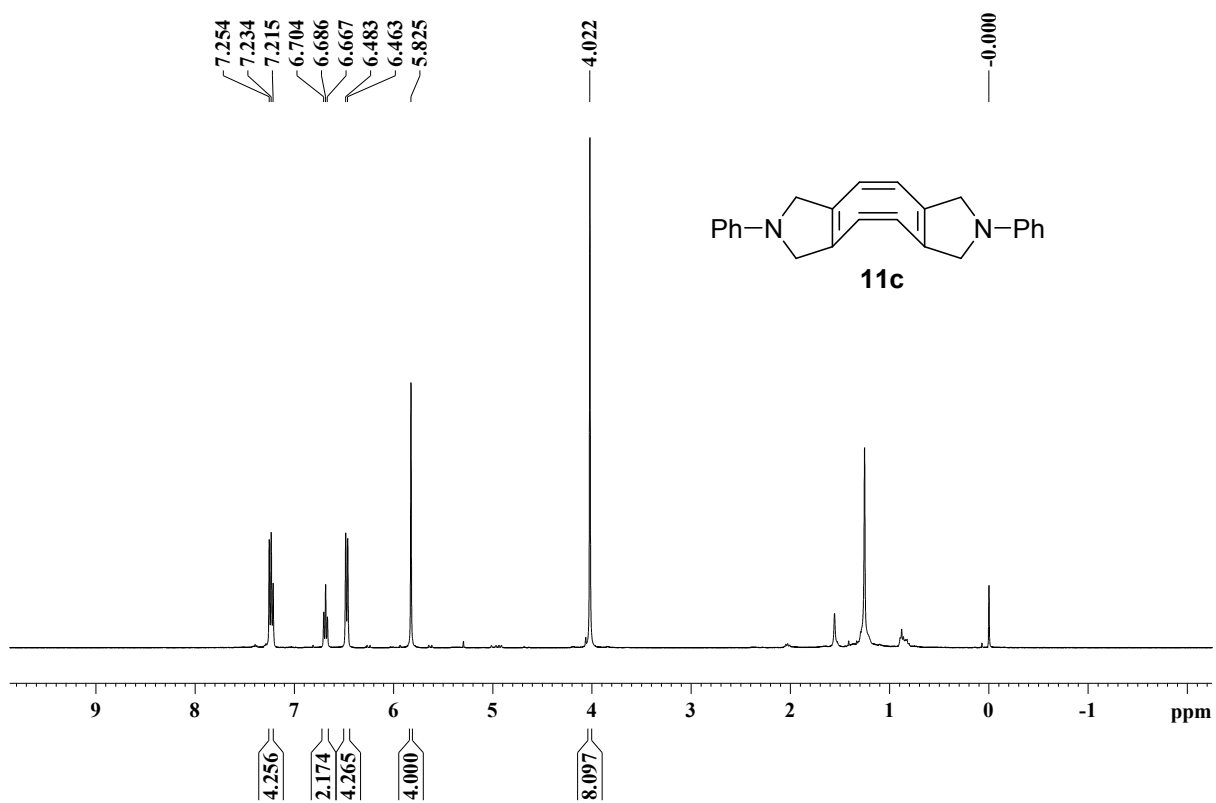

Figure 35 400 MHz  $^1\text{H}$  NMR spectrum of **11c** in  $\text{CDCl}_3$ .

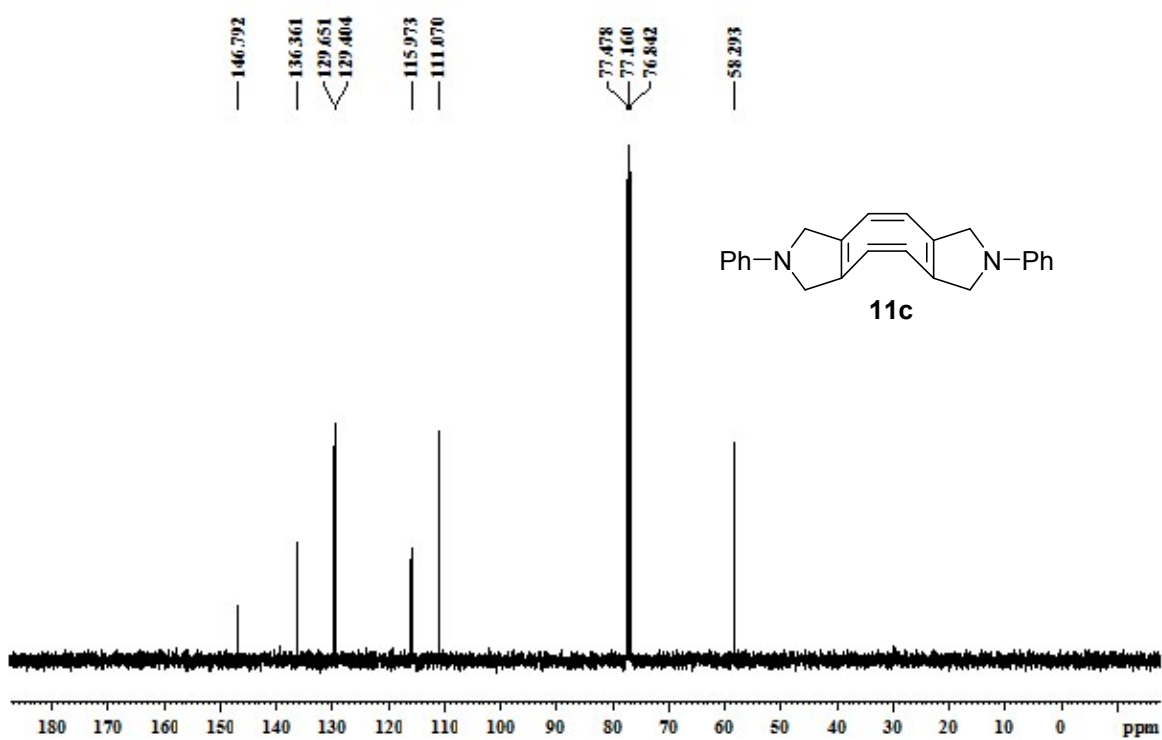

Figure 36 100 MHz  $^{13}\text{C}$  NMR spectrum of **11c** in  $\text{CDCl}_3$ .

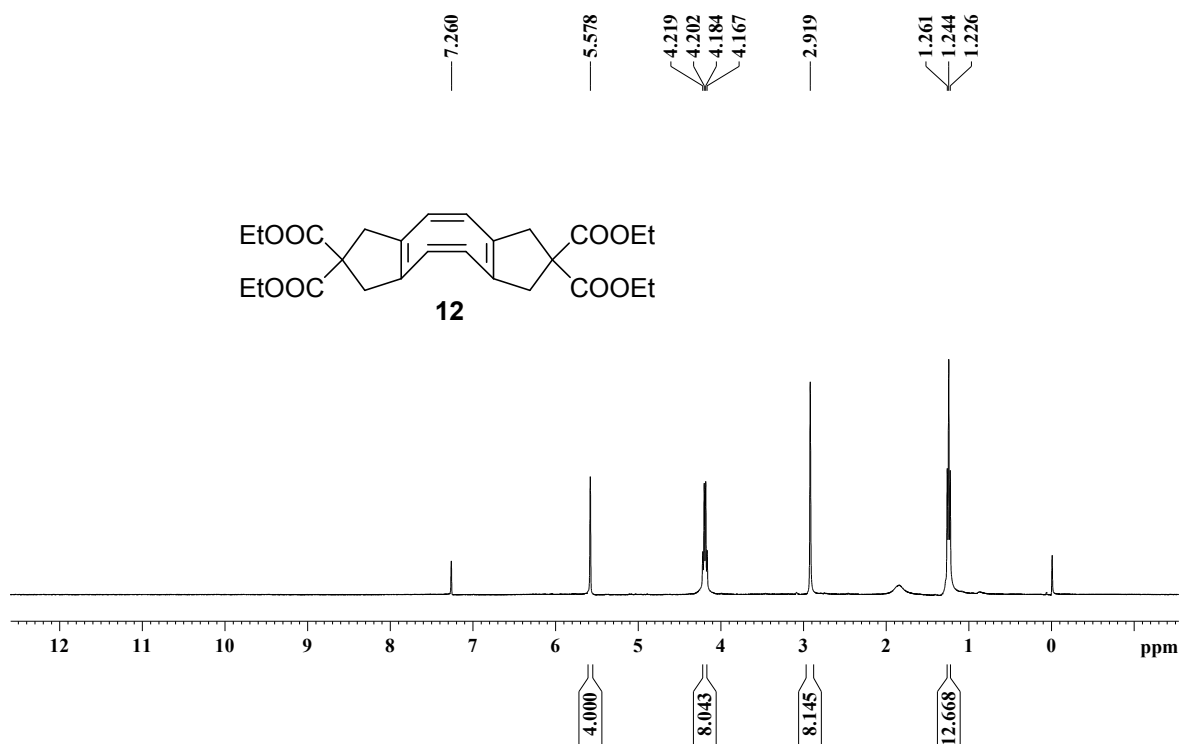

Figure 37 400 MHz <sup>1</sup>H NMR spectrum of **12** in CDCl<sub>3</sub>.

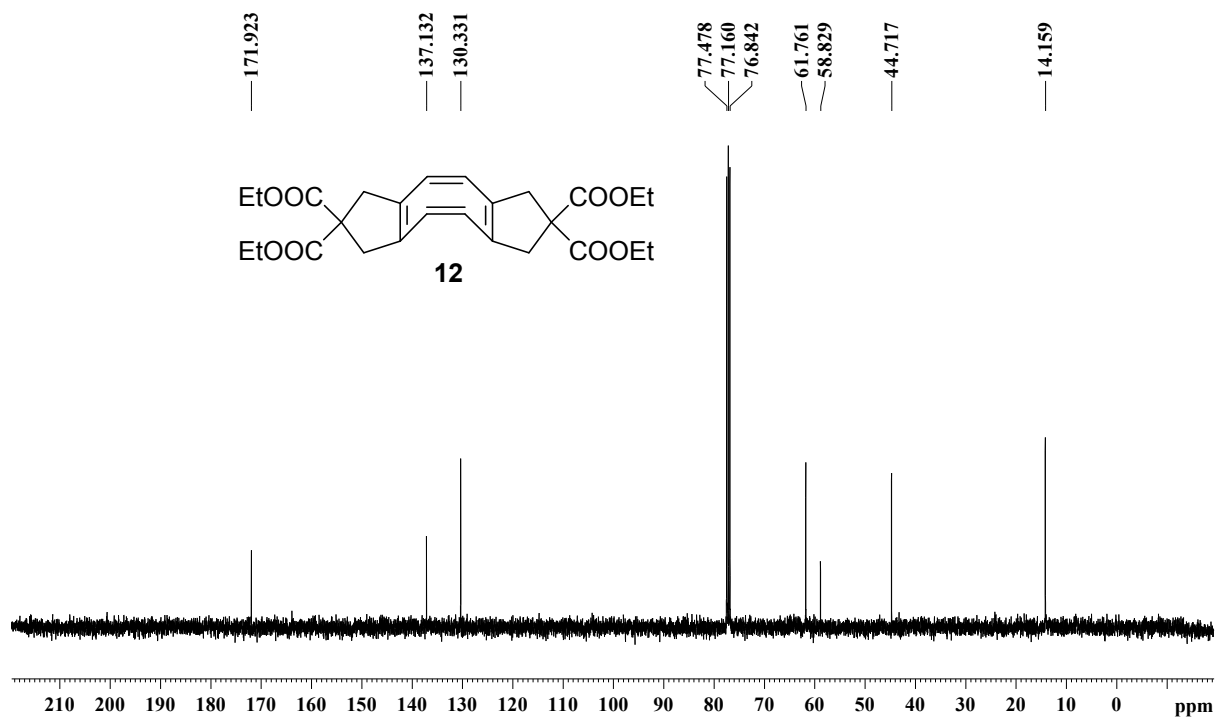

Figure 38 100 MHz <sup>13</sup>C NMR spectrum of **12** in CDCl<sub>3</sub>.

**Single crystal X-ray crystallographic data:**

Single crystals of Compounds **1, 2, 3, 6, 9, 10a, 11b** suitable for XRD studies have been taken from the synthesized compounds. The crystals of compounds **1, 2, 3, 6, 9, 10a, 11b** were grown by slow evaporation of solvents- methanol, chloroform, chloroform/hexane(1:1), chloroform/acetone(1:1), dichloromethane, ethylacetate/hexane (1:1), chloroform respectively at room temperature over a period of 1-4 days.

X-ray data of **1, 2, 3, 6, 9, 10a, 11b** were collected by Bruker AXS (Kappa Apex 2) CCD diffractometer equipped with graphite monochromatic Mo ( $K\alpha$ ) ( $\lambda = 0.7107$  A) radiation source. The crystals were solved by direct methods using Bruker SHELXS (Sheldrick, 1997). The Structure was refined using the Bruker SHELXTL (Version 6.12) software package.

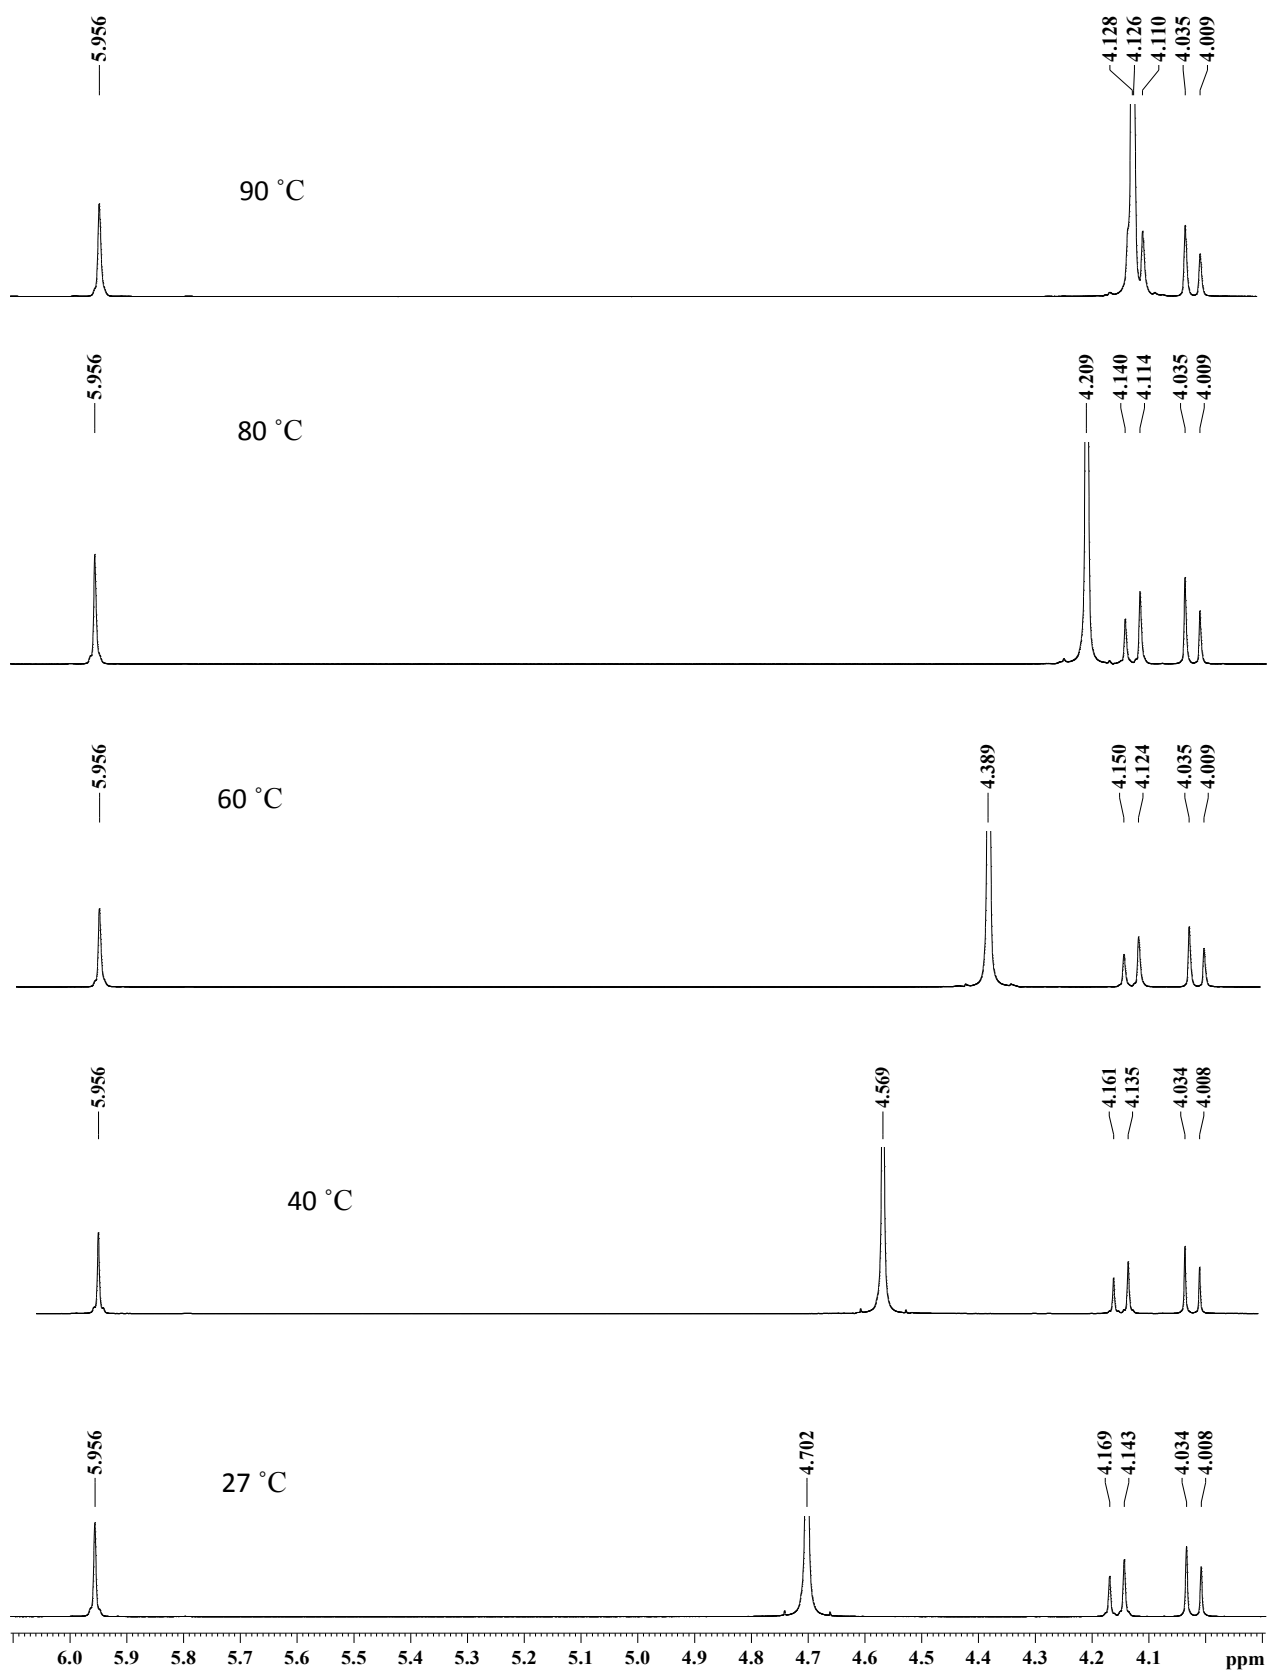

Figure 39 VT-NMR ( $^1\text{H}$  NMR, 400 MHz, in  $\text{D}_2\text{O}$ ) of tetra alcohol **1**

**Table S1: X- Ray Analysis data for compound 1** (CCDC number: 2026059)

|                                   |                                                                                                  |                                                                                     |
|-----------------------------------|--------------------------------------------------------------------------------------------------|-------------------------------------------------------------------------------------|
| Empirical formula                 | C <sub>12</sub> H <sub>16</sub> O <sub>4</sub>                                                   | 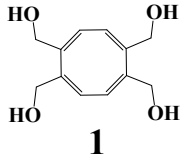 |
| Formula weight                    | 224.25                                                                                           |                                                                                     |
| Temperature                       | 296(2) K                                                                                         |                                                                                     |
| Wavelength                        | 0.71073 Å                                                                                        |                                                                                     |
| Crystal system, space group       | Monoclinic, C2/c                                                                                 |                                                                                     |
| Unit cell dimensions              | a = 11.6744(7) Å, α = 90 °.<br>b = 9.2737(6) Å, β = 114.210(2) °.<br>c = 11.2747(5) Å, γ = 90 °. |                                                                                     |
| Volume                            | 1113.29(11) Å <sup>3</sup>                                                                       |                                                                                     |
| Z, Calculated density             | 4, 1.338 Mg/m <sup>3</sup>                                                                       |                                                                                     |
| Absorption coefficient            | 0.100 mm <sup>-1</sup>                                                                           |                                                                                     |
| F (000)                           | 480                                                                                              |                                                                                     |
| Crystal size                      | 0.100 x 0.200 x 0.120 mm                                                                         |                                                                                     |
| Theta range for data collection   | 2.913 to 24.990 deg.                                                                             |                                                                                     |
| Limiting indices                  | -13 ≤ h ≤ 13, -10 ≤ k ≤ 10, -13 ≤ l ≤ 12                                                         |                                                                                     |
| Reflections collected / unique    | 4305 / 981 [R(int) = 0.0348]                                                                     |                                                                                     |
| Completeness to theta = 24.990    | 99.8 %                                                                                           |                                                                                     |
| Absorption correction             | None                                                                                             |                                                                                     |
| Refinement method                 | Full-matrix least-squares on F <sup>2</sup>                                                      |                                                                                     |
| Data / restraints / parameters    | 981 / 0 / 82                                                                                     |                                                                                     |
| Goodness-of-fit on F <sup>2</sup> | 1.042                                                                                            |                                                                                     |
| Final R indices [I > 2σ (I)]      | R1 = 0.0431, wR2 = 0.0979                                                                        |                                                                                     |
| R indices (all data)              | R1 = 0.0604, wR2 = 0.1096                                                                        |                                                                                     |
| Extinction coefficient            | 0.0088(19)                                                                                       |                                                                                     |
| Largest diff. peak and hole       | 0.303 and -0.154 e. Å <sup>-3</sup>                                                              |                                                                                     |



**Table S2: X- Ray Analysis data for compound 2** (CCDC number: 2026058)

|                                   |                                                                                                                                                                               |                                                                                    |
|-----------------------------------|-------------------------------------------------------------------------------------------------------------------------------------------------------------------------------|------------------------------------------------------------------------------------|
| Empirical formula                 | $C_{18} H_{24} O_4$                                                                                                                                                           |                                                                                    |
| Formula weight                    | 304.37                                                                                                                                                                        |                                                                                    |
| Temperature                       | 296(2) K                                                                                                                                                                      | 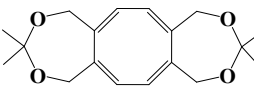 |
| Wavelength                        | 0.71073 Å                                                                                                                                                                     |                                                                                    |
| Crystal system, space group       | Triclinic, P-1                                                                                                                                                                |                                                                                    |
| Unit cell dimensions              | $a = 6.9814(6) \text{ \AA}$ $\alpha = 62.708(4)^\circ$<br>$b = 11.3970(10) \text{ \AA}$ $\beta = 82.487(5)^\circ$<br>$c = 11.8876(11) \text{ \AA}$ $\gamma = 73.520(5)^\circ$ |                                                                                    |
| Volume                            | $806.03(13) \text{ \AA}^3$                                                                                                                                                    |                                                                                    |
| Z, Calculated density             | 2, 1.254 Mg/m <sup>3</sup>                                                                                                                                                    |                                                                                    |
| Absorption coefficient            | 0.087 mm <sup>-1</sup>                                                                                                                                                        |                                                                                    |
| F(000)                            | 328                                                                                                                                                                           |                                                                                    |
| Crystal size                      | 0.250 x 0.220 x 0.100 mm                                                                                                                                                      |                                                                                    |
| Theta range for data collection   | 1.928 to 24.991 deg.                                                                                                                                                          |                                                                                    |
| Limiting indices                  | $-8 \leq h \leq 8$ , $-13 \leq k \leq 10$ , $-14 \leq l \leq 13$                                                                                                              |                                                                                    |
| Reflections collected / unique    | 11837 / 2841 [R(int) = 0.0558]                                                                                                                                                |                                                                                    |
| Completeness to theta = 24.991    | 99.9 %                                                                                                                                                                        |                                                                                    |
| Absorption correction             | None                                                                                                                                                                          |                                                                                    |
| Refinement method                 | Full-matrix least-squares on F <sup>2</sup>                                                                                                                                   |                                                                                    |
| Data / restraints / parameters    | 2841 / 0 / 204                                                                                                                                                                |                                                                                    |
| Goodness-of-fit on F <sup>2</sup> | 1.032                                                                                                                                                                         |                                                                                    |
| Final R indices [I > 2 σ (I)]     | R1 = 0.0652, wR2 = 0.1980                                                                                                                                                     |                                                                                    |
| R indices (all data)              | R1 = 0.0953, wR2 = 0.2217                                                                                                                                                     |                                                                                    |
| Extinction coefficient            | 0.027(8)                                                                                                                                                                      |                                                                                    |
| Largest diff. peak and hole       | 0.381 and -0.237 e. Å <sup>-3</sup>                                                                                                                                           |                                                                                    |

**Table S3: X-Ray Analysis data for compound 3 (CCDC number: 2026057)**

|                                   |                                                                                                                 |                                                                                     |
|-----------------------------------|-----------------------------------------------------------------------------------------------------------------|-------------------------------------------------------------------------------------|
| Empirical formula                 | C <sub>72</sub> H <sub>72</sub> Br <sub>24</sub>                                                                | 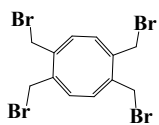 |
| Formula weight                    | 2855.13                                                                                                         |                                                                                     |
| Temperature                       | 296(2) K                                                                                                        |                                                                                     |
| Wavelength                        | 0.71073 Å                                                                                                       |                                                                                     |
| Crystal system, space group       | Triclinic, P-1                                                                                                  |                                                                                     |
| Unit cell dimensions              | a = 13.2408(7) Å, α = 90.016(3) °.<br>b = 14.8169(9) Å, β = 90.019(3) °.<br>c = 23.1350(15) Å, γ = 94.823(3) °. |                                                                                     |
| Volume                            | 4522.7(5) Å <sup>3</sup>                                                                                        |                                                                                     |
| Z, Calculated density             | 2, 2.097 Mg/m <sup>3</sup>                                                                                      |                                                                                     |
| Absorption coefficient            | 10.652 mm <sup>-1</sup>                                                                                         |                                                                                     |
| F(000)                            | 2688                                                                                                            |                                                                                     |
| Crystal size                      | 0.250 x 0.220 x 0.100 mm                                                                                        |                                                                                     |
| Theta range for data collection   | 0.880 to 24.999 deg.                                                                                            |                                                                                     |
| Limiting indices                  | -15<=h<=14, -17<=k<=17, -27<=l<=27                                                                              |                                                                                     |
| Reflections collected / unique    | 43850 / 15423 [R(int) = 0.1486]                                                                                 |                                                                                     |
| Completeness to theta = 24.999    | 96.6 %                                                                                                          |                                                                                     |
| Absorption correction             | None                                                                                                            |                                                                                     |
| Refinement method                 | Full-matrix least-squares on F <sup>2</sup>                                                                     |                                                                                     |
| Data / restraints / parameters    | 15423 / 12 / 865                                                                                                |                                                                                     |
| Goodness-of-fit on F <sup>2</sup> | 1.171                                                                                                           |                                                                                     |
| Final R indices [I>2 σ (I)]       | R1 = 0.0801, wR2 = 0.1433                                                                                       |                                                                                     |
| R indices (all data)              | R1 = 0.2562, wR2 = 0.1869                                                                                       |                                                                                     |
| Extinction coefficient            | n/a                                                                                                             |                                                                                     |
| Largest diff. peak and hole       | 1.564 and -1.142 e. Å <sup>-3</sup>                                                                             |                                                                                     |

**Table S4: X- Ray Analysis data for compound 6** (CCDC number: 2023452)

|                                   |                                                                    |                                |
|-----------------------------------|--------------------------------------------------------------------|--------------------------------|
| Empirical formula                 | $C_{44}H_{36}N_{12}$                                               |                                |
| Formula weight                    | 732.85                                                             |                                |
| Temperature                       | 296(2) K                                                           |                                |
| Wavelength                        | 0.71073 Å                                                          |                                |
| Crystal system                    | Monoclinic                                                         |                                |
| Space group                       | $C2/c$                                                             |                                |
| Unit cell dimensions              | $a = 23.8429(11)$ Å                                                | $\alpha = 90^\circ$ .          |
|                                   | $b = 14.4588(7)$ Å                                                 | $\beta = 116.4550(10)^\circ$ . |
|                                   | $c = 12.0020(5)$ Å                                                 | $\gamma = 90^\circ$ .          |
| Volume                            | $3704.3(3)$ Å <sup>3</sup>                                         |                                |
| Z                                 | 4                                                                  |                                |
| Density (calculated)              | 1.314 Mg/m <sup>3</sup>                                            |                                |
| Absorption coefficient            | 0.082 mm <sup>-1</sup>                                             |                                |
| F(000)                            | 1536                                                               |                                |
| Crystal size                      | 0.300 x 0.250 x 0.200 mm <sup>3</sup>                              |                                |
| Theta range for data collection   | 3.191 to 25.997°.                                                  |                                |
| Index ranges                      | $-29 \leq h \leq 29$ , $-17 \leq k \leq 17$ , $-12 \leq l \leq 14$ |                                |
| Reflections collected             | 36006                                                              |                                |
| Independent reflections           | 3632 [R(int) = 0.0415]                                             |                                |
| Completeness to theta = 25.242°   | 99.6 %                                                             |                                |
| Absorption correction             | Semi-empirical from equivalents                                    |                                |
| Max. and min. transmission        | 0.7458 and 0.7022                                                  |                                |
| Refinement method                 | Full-matrix least-squares on F <sup>2</sup>                        |                                |
| Data / restraints / parameters    | 3632 / 0 / 254                                                     |                                |
| Goodness-of-fit on F <sup>2</sup> | 1.081                                                              |                                |
| Final R indices [I > 2σ(I)]       | R1 = 0.0494, wR2 = 0.1170                                          |                                |
| R indices (all data)              | R1 = 0.0810, wR2 = 0.1456                                          |                                |
| Extinction coefficient            | 0.0114(11)                                                         |                                |
| Largest diff. peak and hole       | 0.162 and -0.195 e.Å <sup>-3</sup>                                 |                                |

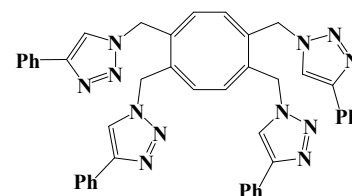

**Table S5: X- Ray Analysis data for compound 9** (CCDC number: 2023451)

|                                        |                                                                                              |                                                                                     |
|----------------------------------------|----------------------------------------------------------------------------------------------|-------------------------------------------------------------------------------------|
| Empirical formula                      | $C_{20} H_{38} O_{13} P_4$                                                                   |                                                                                     |
| Formula weight                         | 610.38                                                                                       |                                                                                     |
| Temperature                            | 296(2) K                                                                                     | 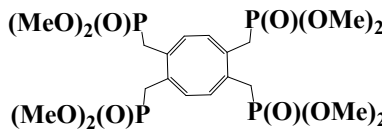 |
| Wavelength                             | 0.71073 Å                                                                                    |                                                                                     |
| Crystal system                         | Monoclinic                                                                                   |                                                                                     |
| Space group                            | C2/c                                                                                         |                                                                                     |
| Unit cell dimensions                   | $a = 15.6392(6) \text{ \AA}$<br>$b = 18.8539(9) \text{ \AA}$<br>$c = 12.4008(7) \text{ \AA}$ | $\alpha = 90^\circ$<br>$\beta = 127.7290(10)^\circ$<br>$\gamma = 90^\circ$          |
| Volume                                 | $2892.0(2) \text{ \AA}^3$                                                                    |                                                                                     |
| Z                                      | 4                                                                                            |                                                                                     |
| Density (calculated)                   | $1.402 \text{ Mg/m}^3$                                                                       |                                                                                     |
| Absorption coefficient                 | $0.320 \text{ mm}^{-1}$                                                                      |                                                                                     |
| F(000)                                 | 1288                                                                                         |                                                                                     |
| Crystal size                           | $0.200 \times 0.200 \times 0.150 \text{ mm}^3$                                               |                                                                                     |
| Theta range for data collection        | $2.160$ to $24.996^\circ$ .                                                                  |                                                                                     |
| Index ranges                           | $-18 \leq h \leq 18$ , $-22 \leq k \leq 22$ , $-14 \leq l \leq 14$                           |                                                                                     |
| Reflections collected                  | 26490                                                                                        |                                                                                     |
| Independent reflections                | 2557 [R(int) = 0.0371]                                                                       |                                                                                     |
| Completeness to theta = $24.996^\circ$ | 99.9 %                                                                                       |                                                                                     |
| Absorption correction                  | Semi-empirical from equivalents                                                              |                                                                                     |
| Max. and min. transmission             | 0.7461 and 0.6985                                                                            |                                                                                     |
| Refinement method                      | Full-matrix least-squares on $F^2$                                                           |                                                                                     |
| Data / restraints / parameters         | 2557 / 62 / 191                                                                              |                                                                                     |
| Goodness-of-fit on $F^2$               | 1.070                                                                                        |                                                                                     |
| Final R indices [ $I > 2\sigma(I)$ ]   | R1 = 0.0411, wR2 = 0.0992                                                                    |                                                                                     |
| R indices (all data)                   | R1 = 0.0613, wR2 = 0.1168                                                                    |                                                                                     |
| Extinction coefficient                 | n/a                                                                                          |                                                                                     |
| Largest diff. peak and hole            | 0.336 and $-0.292 \text{ e.\AA}^{-3}$                                                        |                                                                                     |

**Table S6: X-Ray Analysis data for compound 10a** (CCDC number: 2023450)

|                                   |                                                                                                                      |                                                                                     |
|-----------------------------------|----------------------------------------------------------------------------------------------------------------------|-------------------------------------------------------------------------------------|
| Empirical formula                 | C <sub>40</sub> H <sub>32</sub>                                                                                      | 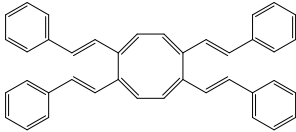 |
| Formula weight                    | 12.65                                                                                                                |                                                                                     |
| Temperature                       | 296(2) K                                                                                                             |                                                                                     |
| Wavelength                        | 0.71073 Å                                                                                                            |                                                                                     |
| Crystal system, space group       | Triclinic, P-1                                                                                                       |                                                                                     |
| Unit cell dimensions              | a = 10.4475(5) Å    α = 100.338(2) °<br>b = 12.2806(5) Å    β = 99.001(3) °<br>c = 12.3903(7) Å,    γ = 104.084(2) ° |                                                                                     |
| Volume                            | 1483.14(13) Å <sup>3</sup>                                                                                           |                                                                                     |
| Z, Calculated density             | 2, 1.148 Mg/m <sup>3</sup>                                                                                           |                                                                                     |
| Absorption coefficient            | 0.065 mm <sup>-1</sup>                                                                                               |                                                                                     |
| F(000)                            | 544                                                                                                                  |                                                                                     |
| Crystal size                      | 0.250 x 0.220 x 0.100 mm                                                                                             |                                                                                     |
| Theta range for data collection   | 1.755 to 24.888 deg.                                                                                                 |                                                                                     |
| Limiting indices                  | -12 ≤ h ≤ 12, -14 ≤ k ≤ 13, -14 ≤ l ≤ 14                                                                             |                                                                                     |
| Reflections collected / unique    | 19603 / 5144 [R(int) = 0.0456]                                                                                       |                                                                                     |
| Completeness to theta = 24.888    | 99.4 %                                                                                                               |                                                                                     |
| Absorption correction             | None                                                                                                                 |                                                                                     |
| Refinement method                 | Full-matrix least-squares on F <sup>2</sup>                                                                          |                                                                                     |
| Data / restraints / parameters    | 5144 / 0 / 362                                                                                                       |                                                                                     |
| Goodness-of-fit on F <sup>2</sup> | 1.008                                                                                                                |                                                                                     |
| Final R indices [I > 2σ(I)]       | R1 = 0.0490, wR2 = 0.1054                                                                                            |                                                                                     |
| R indices (all data)              | R1 = 0.1036, wR2 = 0.1347                                                                                            |                                                                                     |
| Extinction coefficient            | 0.0080(14)                                                                                                           |                                                                                     |
| Largest diff. peak and hole       | 0.136 and -0.143 e Å <sup>-3</sup>                                                                                   |                                                                                     |

**Table S7: X-Ray Analysis data for compound 11b** (CCDC number: 2023453)

|                                   |                                                                                                                      |                                                                                     |
|-----------------------------------|----------------------------------------------------------------------------------------------------------------------|-------------------------------------------------------------------------------------|
| Empirical formula                 | $C_{28}H_{30}N_2$                                                                                                    | 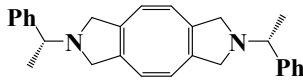 |
| Formula weight                    | 394.54                                                                                                               |                                                                                     |
| Temperature                       | 296(2) K                                                                                                             |                                                                                     |
| Wavelength                        | 0.71073 Å                                                                                                            |                                                                                     |
| Crystal system, space group       | Orthorhombic, P2 (1)2(1)2(1)                                                                                         |                                                                                     |
| Unit cell dimensions              | a = 6.8590(5) Å $\alpha = 90^\circ$<br>b = 17.0662(11) Å $\beta = 90^\circ$<br>c = 19.6709(10) Å $\gamma = 90^\circ$ |                                                                                     |
| Volume                            | 2302.6(3) Å <sup>3</sup>                                                                                             |                                                                                     |
| Z, Calculated density             | 4, 1.138 Mg/m <sup>3</sup>                                                                                           |                                                                                     |
| Absorption coefficient            | 0.066 mm <sup>-1</sup>                                                                                               |                                                                                     |
| F(000)                            | 848                                                                                                                  |                                                                                     |
| Crystal size                      | 0.250 x 0.220 x 0.100 mm                                                                                             |                                                                                     |
| Theta range for data collection   | 1.580 to 24.994 deg.                                                                                                 |                                                                                     |
| Limiting indices                  | -8 ≤ h ≤ 4, -20 ≤ k ≤ 15, -23 ≤ l ≤ 21                                                                               |                                                                                     |
| Reflections collected / unique    | 9856 / 4034 [R(int) = 0.0384]                                                                                        |                                                                                     |
| Completeness to theta = 24.994    | 100.0 %                                                                                                              |                                                                                     |
| Absorption correction             | None                                                                                                                 |                                                                                     |
| Refinement method                 | Full-matrix least-squares on F <sup>2</sup>                                                                          |                                                                                     |
| Data / restraints / parameters    | 4034 / 0 / 274                                                                                                       |                                                                                     |
| Goodness-of-fit on F <sup>2</sup> | 0.979                                                                                                                |                                                                                     |
| Final R indices [I > 2σ(I)]       | R1 = 0.0459, wR2 = 0.0917                                                                                            |                                                                                     |
| R indices (all data)              | R1 = 0.0893, wR2 = 0.1133                                                                                            |                                                                                     |
| Absolute structure parameter      | -0.8(10)                                                                                                             |                                                                                     |
| Extinction coefficient            | 0.017(2)                                                                                                             |                                                                                     |
| Largest diff. peak and hole       | 0.115 and -0.153 e. Å <sup>-3</sup>                                                                                  |                                                                                     |

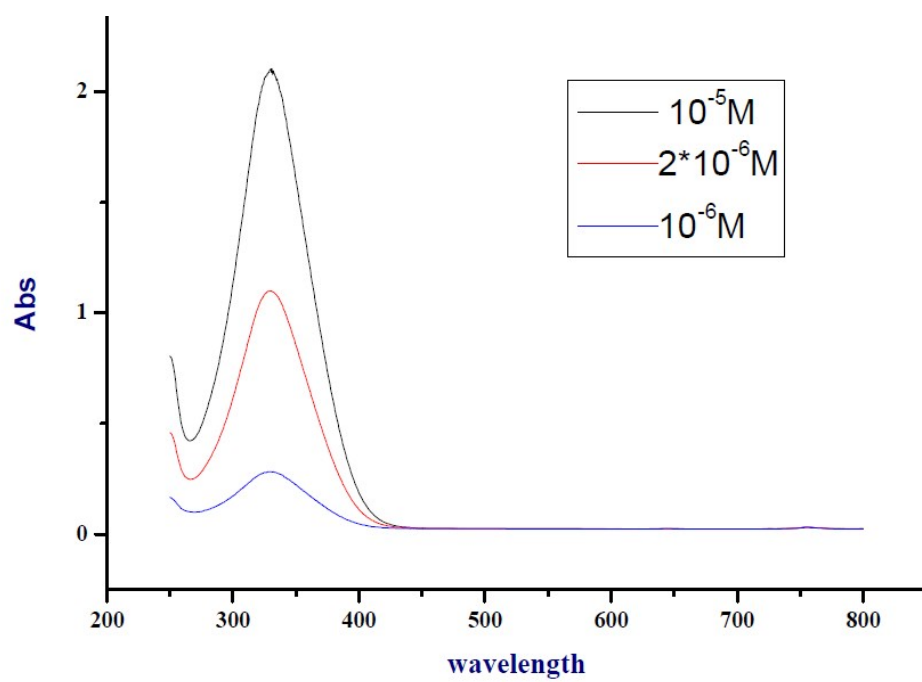

**Figure 40** UV-Vis spectrum of compound **10a** in THF (concentration shown in the inset)
